1 Catabolism of alkylphenols in *Rhodococcus* via a *meta*-cleavage pathway  
2 associated with genomic islands

3

4 Running title: Alkylphenol catabolism in *Rhodococcus*

5

6 Authors: David J. Levy-Booth<sup>a</sup>, Morgan M. Fetherolf<sup>a</sup>, Gordon Stewart<sup>a</sup>, Jie Liu<sup>a</sup>, Lindsay D.

7 Eltis<sup>a</sup> and William W. Mohn<sup>a#</sup>

8 Affiliations:

9 1. Department of Microbiology & Immunology, Life Sciences Institute, The University of British  
10 Columbia, Vancouver, British Columbia, Canada

11 D.L.B and M.M.F. contributed equally to this work.

12

13 #Correspondence:

14 WW Mohn, Department of Microbiology & Immunology, Life Sciences Institute, The University  
15 of British Columbia, 2350 Health Sciences Mall, Vancouver, British Columbia V6T 1Z3,  
16 Canada. E-mail: [wmohn@mail.ubc.ca](mailto:wmohn@mail.ubc.ca)

17

18

## 19 Abstract

20 The bacterial catabolism of aromatic compounds has considerable promise to convert lignin  
21 depolymerization products to commercial chemicals. Alkylphenols are a key class of  
22 depolymerization products whose catabolism is not well elucidated. We isolated *Rhodococcus*  
23 *rhodochrous* EP4 on 4-ethylphenol and applied genomic and transcriptomic approaches to  
24 elucidate alkylphenol catabolism in EP4 and *Rhodococcus jostii* RHA1. RNA-Seq and RT-qPCR  
25 revealed a pathway encoded by the *aphABCDEFGHIQRS* genes that degrades 4-ethylphenol via  
26 the *meta*-cleavage of 4-ethylcatechol. This process was initiated by a two-component  
27 alkylphenol hydroxylase, encoded by the *aphAB* genes, which were up-regulated ~3,000-fold.  
28 Purified AphAB from EP4 had highest specific activity for 4-ethylphenol and 4-propylphenol  
29 (~2000 U/mg) but did not detectably transform phenol. Nevertheless, a  $\Delta aphA$  mutant in RHA1  
30 grew on 4-ethylphenol by compensatory up-regulation of phenol hydroxylase genes (*pheA1-3*).  
31 Deletion of *aphC*, encoding an extradiol dioxygenase, prevented growth on 4-alkylphenols but  
32 not phenol. Disruption of *pcaL* in the  $\beta$ -ketoacid pathway prevented growth on phenol but not  
33 4-alkylphenols. Thus, 4-ethylphenol and 4-propylphenol are catabolized exclusively via *meta*-  
34 cleavage in rhodococci while phenol is subject to *ortho*-cleavage. Putative genomic islands  
35 encoding *aph* genes were identified in EP4 and several other rhodococci. Overall, this study  
36 identifies a 4-alkylphenol pathway in rhodococci, demonstrates key enzymes involved, and  
37 presents evidence that the pathway is encoded in a genomic island. These advances are of  
38 particular importance for wide-ranging industrial applications of rhodococci, including  
39 upgrading of lignocellulose biomass.

## 40 Importance

41 Elucidation of bacterial alkylphenol catabolism is important for the development of  
42 biotechnologies to upgrade the lignin component of plant biomass. We isolated a new strain,  
43 *Rhodococcus rhodochrous* EP4, on 4-ethylphenol, an alkylphenol that occurs in lignin-derived  
44 streams, including reductive catalytic fractionation products of corn stover. We further  
45 demonstrated its degradation via a *meta*-cleavage pathway (Aph) with transcriptomics. A new  
46 class of Actinobacterial hydroxylase, AphAB, acts specifically on alkylphenols. Phylogenomic  
47 analysis indicated that the *aph* genes occur on putative genomic islands in several rhodococcal  
48 strains. These genes were identified in the genetically-tractable strain *Rhodococcus jostii* RHA1.  
49 Strains missing this element cannot metabolise 4-ethylphenol and 4-propylphenol. Overall, we  
50 advanced the understanding of how aromatic compounds are degraded by environmental bacteria  
51 and identified enzymes that can be employed in the transition away from petro-chemicals  
52 towards renewable alternatives.

## 53 Introduction

54 Lignin, a heterogeneous aromatic polymer, accounts for up to 40% dry weight of terrestrial plant  
55 biomass (Ragauskas et al., 2014). It is primarily composed of *p*-hydroxyphenyl (H), guaiacyl  
56 (G), and sinapyl (S) subunits, polymerized by ether and C-C bonds (Boerjan et al., 2003).

57 Lignin's heterogeneity and recalcitrant bonds create substantial barriers to its efficient microbial  
58 and chemical degradation. Industrial lignin depolymerization is gaining traction as a means to  
59 produce fuels and chemicals historically derived from petroleum (Beckham et al., 2016;  
60 Ragauskas et al., 2014). Yet heterogeneous depolymerization products can require extensive  
61 separation and purification (Linger et al., 2014; Ragauskas et al., 2014). Bacterial biocatalysts  
62 provide a means of transforming mixtures of aromatic compounds to single compounds due to  
63 the convergent nature of their catabolic pathways, whereby substrates are transformed to central  
64 metabolites via shared intermediates, such as catechols (Eltis and Singh, 2018; Linger et al.,  
65 2014). Harnessing this biological funneling to refine lignin to high-value chemicals (Beckham et  
66 al., 2016; Eltis and Singh, 2018; Linger et al., 2014) is limited in part by a lack of knowledge of  
67 the catabolism of lignin-derived monomers.

68 Alkylphenols are a major class of aromatic compounds generated by a variety of lignin  
69 depolymerization technologies. For example, solvolysis of corn lignin produced 24 wt %  
70 alkylated monolignins, 46% of which was 4-ethylphenol derived from H-subunits (Jiang et al.,  
71 2014). Alkylphenols were also major pyrolysis products of wheat straw black liquor lignin  
72 fractions (Guo et al., 2017). Existing depolymerization strategies can require multiple stages of  
73 preprocessing and depolymerization, high heat or corrosive chemicals, and can produce dozens  
74 of alkylphenol and aromatic products (Asawaworarit et al., 2019; Kim et al., 2015; Ye et al.,



75 2012). One promising depolymerization strategy that produces a narrow stream of alkylphenols  
76 is reductive catalytic reduction (RCF) (Pepper and Lee, 1969). 4-Ethylphenol was a major RCF  
77 product of corn stover, comprising up to 16.4% of the resulting aromatic monomers (Anderson et  
78 al., 2016).

79 Two bacterial pathways for the aerobic catabolism of 4-ethylphenol have been reported, initially  
80 involving either oxidation of the alkyl-side chain or hydroxylation of the aromatic ring. In  
81 *Pseudomonas putida* JD1, the alkyl-side chain is oxidized by 4-ethylphenol methylhydroxylase  
82 to eventually yield hydroquinone (Darby et al., 1987; Hopper and Cottrell, 2003). In contrast,  
83 *Pseudomonas* sp. KL28 hydroxylates 4-ethylphenol to 4-ethylcatechol (Jeong et al., 2003). In  
84 these pathways, the hydroquinone and 4-ethylcatechol undergo *meta*-cleavage (Darby et al.,  
85 1987; Jeong et al., 2003). In KL28, the alkylphenol hydroxylase is a six-component enzyme  
86 encoded by genes organized in a single co-linear transcriptional unit within a *meta*-cleavage  
87 pathway gene cluster (Jeong et al., 2003). A homologous pathway degrades phenol in  
88 *Comamonas testosteroni* TA441 (Arai et al., 2000).

89 *Rhodococcus* is a genus of mycolic acid-producing Actinobacteria that catabolize a wide variety  
90 of aromatic compounds (Yam et al., 2010), including phenols (Gröning et al., 2014; Kolomytseva  
91 et al., 2007). These bacteria also have considerable potential as biocatalysts for the industrial  
92 production of compounds ranging from nitriles, to steroids and high-value lipids (Alvarez et al.,  
93 1996; Round et al., 2017; Sengupta et al., 2019; Shields-Menard et al., 2017). In *Rhodococcus*,  
94 phenol catabolism is initiated by a two-component flavin-dependent monooxygenase (PheA1A2)  
95 (Saa et al. 2010) to generate a catechol. PheA1A2 homologs in *Rhodococcus opacus* 1CP can  
96 also hydroxylate chlorophenols and 4-methylphenol (Gröning et al., 2014) to produce the

97 corresponding catechols, which undergo *ortho*-cleavage (Kolomytseva et al., 2007; Maltseva et  
98 al., 1994) and subsequent transformation to central metabolites via the  $\beta$ -keto adipate pathway. In  
99 *rhodococci*, the  $\beta$ -keto adipate pathway is confluent, with branches responsible for  
100 protocatechuate and catechol catabolism converging at PcaL, a  $\beta$ -keto adipate enol-lactonase  
101 (Patrauchan et al., 2005; Yam et al., 2010). However, some *rhodococci* appear to have pathways  
102 responsible for the catabolism of alkylated aromatic compounds via *meta*-cleavage (Jang et al.,  
103 2005). Elucidating 4-alkylphenol metabolism in *rhodococci* will improve our understanding of  
104 Actinobacterial aromatic degradation and support the development of *Rhodococcus* strains as  
105 platforms for industrial lignin upgrading.

106 Genomic islands (GIs) are DNA segments likely to have been acquired by horizontal gene  
107 transfer. They are characterized by altered nucleotide characteristics (e.g., GC content), syntenic  
108 conservation, and frequent presence of mobility genes (transposases, insertion sequences (IS),  
109 and integrases) (Hacker and Kaper, 2000; Juhas et al., 2009). They can be further identified by  
110 the absence of genomic regions in closely-related strains (Hacker et al., 1990). GIs can confer  
111 resistance, virulence, symbiosis, and catabolic pathways (Dobrindt et al., 2004; Juhas et al.,  
112 2009). For example, the self-transferable *clc* element enabling 3- and 4-chlorocatechol and 2-  
113 aminophenol catabolism was identified as a GI in several *Gamma*- and *Betaproteobacteria*  
114 strains (Gaillard et al., 2006). Recent horizontal gene transfer may have played less of a role in  
115 shaping the *Rhodococcus jostii* RHA1 genome than in other bacteria such as *Burkholderia*  
116 *xenovorans* LB400, which has a similarly-sized genome (McLeod et al., 2006). Further, although  
117 RHA1 contains a high number of aromatic pathways, genes encoding these pathways are slightly  
118 underrepresented in the identified genomic islands. GIs can ameliorate in host genomes through

119 nucleotide optimization or loss of mobility elements (Juhas et al., 2009; Lawrence and Ochman,  
120 1997), reducing our effectiveness at predicting ancestral genomic additions. However,  
121 examination of GIs in multiple related genomes with an ensemble of predictive software can  
122 improve our understanding of the role of GIs in the evolution of bacterial catabolic pathways.  
123 This study sought to identify catabolic pathways required for 4-alkylphenol catabolism. We  
124 report on the genomic, transcriptomic and enzymatic characterization of 4-alkylphenol  
125 catabolism in a newly-isolated 4-ethylphenol-degrading bacterium, *Rhodococcus rhodochrous*  
126 EP4 (Figure 1A), as well as RHA1. The activity of a novel two-component alkylphenol  
127 monooxygenase (AphAB) was characterized. Gene deletion analysis was employed to identify  
128 the subsequent route of catechol catabolism. Genomic analysis identified a putative *aph* GI,  
129 providing new evolutionary insight to the *aph meta*-cleavage pathway in *Rhodococcus*.  
130 Knowledge gained by this study will facilitate the efficient valorization of lignin following its  
131 depolymerization.

## 132 [Materials and Methods](#)

### 133 [Bacterial strains and growth conditions](#)

134 Liquid enrichment cultures were inoculated with either ~4 month aged agricultural compost (~25  
135 cm depth) from The University of British Columbia farm (49° 14' 57.8904" N, 123° 14' 0.0492"  
136 W) or forest soil from Pacific Spirit Park in Vancouver, Canada. The cultures contained 1.0 mM  
137 4-ethylphenol ( $\geq 97.0\%$  Sigma-Aldrich, St. Louis, U.S.A.) as sole organic substrate in M9-  
138 Goodies (Bauchop and Elsdon, 1960; Elder, 1983). The cultures were incubated at 30°C with  
139 shaking at 200 rpm for 2 weeks. Removal of 4-ethylphenol was monitored by GC-MS, after  
140 which cultures were transferred to fresh medium, 0.5% inocula. After 3 serial transfers, isolates

141 were obtained by plating on homologous medium solidified with 1.5% purified agar. Colonies  
142 appeared in 10 days. Individual colonies were transferred to liquid media and replated on solid  
143 media for colony isolation. *Rhodococcus rhodochrous* strain DSM43241 was purchased from  
144 DSMZ (Braunschweig, Germany).

145 EP4 and RHA1 cultures for RNA extraction were grown overnight at 30°C on LB broth (200  
146 rpm), diluted to 0.05 OD<sub>600</sub> and washed thrice in M9 with no supplement, and grown to mid-log  
147 phase on 50 ml M9-Goodies with 1.0 mM 4-ethylphenol or succinate. EP4 was additionally  
148 grown on 1.0 mM benzoate (99%, Sigma-Aldrich). Additional screening of EP4, *R. rhodochrous*  
149 DSM43241, RHA1, and mutant strains used 5 ml M9-Goodies with 1.0 mM phenol ( $\geq 99\%$ ,  
150 VWR International, Ltd., Mississauga, Canada), 3-methylphenol (*m*-cresol; 99% Sigma-  
151 Aldrich), 4-methylphenol (99% Sigma-Aldrich), 4-propylphenol ( $>99\%$ , TCI), 3,4-  
152 dimethylphenol (DMP) (99% Sigma-Aldrich), 2,4-DMP (98% Sigma-Aldrich), 4-  
153 hydroxyphenylacetate (HPA) (98% Sigma-Aldrich), 4-hydroxybenzoic acid (HBA) (99%  
154 Sigma-Aldrich), or 0.5 mM 4-nitrophenol (NP) ( $\geq 99\%$ , Sigma-Aldrich), incubated for 24 h.  
155 Cells were lysed by boiling in 1M NaOH and protein quantified using the Micro BCA™ Protein  
156 Assay (Thermo-Fisher Scientific Inc., Waltham, U.S.A.) and a VersaMax™ microplate reader  
157 (Molecular Devices LLC, San Jose, U.S.A.).

#### 158 DNA manipulation, plasmid construction and gene deletion

159 DNA was isolated, manipulated, and analyzed using standard protocols (Sambrock and W.  
160 Russel, 2001). *E. coli* and RHA1 were transformed with DNA by electroporation using a  
161 MicroPulser with GenePulser cuvettes (Bio-Rad). To produce N-terminal His<sub>6</sub>-tagged AphA<sub>EP4</sub>,  
162 AphB<sub>EP4</sub> and AphC<sub>RHA1</sub> (See Table 1) C6369\_RS01585, C6369\_RS01550 and RHA1\_RS18750  
163 were amplified from genomic DNA using Phusion Polymerase™ with the oligonucleotides listed

164 in Supplementary Table 1. The nucleotide sequence of the cloned genes was verified. The *ΔaphA*  
165 and *ΔaphC* mutants were constructed using a *sacB* counter selection system (van der Geize et al.,  
166 2007). Five hundred bp flanking regions of RHA1\_RS18785 and RHA1\_RS18750 were  
167 amplified from RHA1 genomic DNA using the primers listed in Supplementary Table 1. The  
168 resulting amplicons were inserted into pK18mobsacB linearized with EcoR1 using Gibson  
169 Assembly. The nucleotide sequences of the resulting constructs were verified. Kanamycin-  
170 sensitive/sucrose-resistant colonies were screened using PCR and the gene deletion was  
171 confirmed by sequencing.

## 172 Enzyme production and purification

173 The production and purification of AphA<sub>EP4</sub>, AphB<sub>EP4</sub> and AphC<sub>RHA1</sub> are described in  
174 Supplementary Methods.

## 175 GC/MS analysis

176 Growth substrate depletion was analyzed in culture supernatants using an Agilent Technologies  
177 (Santa Clara, U.S.A.) 6890N gas chromatograph equipped with a 30-m Agilent 190915-433  
178 capillary column and a 5973 mass-selective detector (GC/MS). Briefly, 400- $\mu$ l samples of  
179 culture supernatant were amended with 3-chlorobenzoic acid (as internal standard), extracted  
180 with ethyl acetate (1:1 v/v) and dried under a nitrogen stream. The extract was suspended in  
181 pyridine and derivatized with trimethylsilyl for 1 h at 60°C. One- $\mu$ l injections were analyzed  
182 using the following parameters: transfer line temperature of 325°C, run temperature of 90°C for  
183 3 min, then ramped to 290°C at 12°C min<sup>-1</sup> with a 10 min final hold. Peaks from raw trace files  
184 were aligned and integrated using *xcms* in R 3.4.4 (R Core Team, 2016) against 4-ethylphenol

185 and succinate standards. Values were normalized to the area of the internal standard and  
186 expressed as a percent of maximum peak area.

### 187 Nucleic acid extraction and sequencing

188 RNA was extracted from cellular pellets from 15 ml of EP4 and RHA1 cultures using TRIzol™  
189 (Thermo-Fisher) and Turbo™ DNase (Thermo-Fisher). Quality and quantity of nucleic acids  
190 were assessed using 1% [w/v] agarose gel electrophoresis and Qubit fluorometric quantitation  
191 (Thermo-Fisher), prior to storage at -80°C. Approximately 1 µg RNA underwent Ribo-Zero  
192 rRNA removal (Illumina, San Diego, U.S.A.), TruSeq LT (Illumina) library preparation, and  
193 sequencing using HiSeq4000 2x100bp. Genomic DNA was extracted using CTAB. Fifteen µg  
194 was pulse-field electrophoresis size-selected and sequenced with one Pacific Biosciences  
195 (PacBio) RS II SMRT cell.

### 196 Bioinformatics

197 *A de novo* draft genome was assembled with HGAP in the SMRT Analysis v2.3 pipeline (Chin  
198 et al., 2013) and MeDuSa 1.6 scaffolding (Bosi et al., 2015). Circularizing the genome sequence  
199 was attempted using Circlator 1.5.5 (Hunt et al., 2015), and plasmid detection was attempted  
200 using PlasmidFinder 2.0.1 (Carattoli et al., 2014). Annotation used the NCBI Prokaryotic  
201 Genome Annotation Pipeline (PGAP) 4.4 and BLASTp against the Protein Data Bank (e-value  
202  $10^{-3}$ ). Quality control, filtering and trimming of RNA reads used Trimmomatic 0.3.6 defaults  
203 (Bolger et al., 2014). Assembly used Trinity 2.4.0 (Grabherr et al., 2011). Transcript  
204 quantification used HTSeq 0.9.1 (Anders et al., 2015), FeatureCounts 1.5.0-p3 (Liao et al., 2014)  
205 and Salmon 0.8.1 (Patro et al., 2017). Differentially-expression was analyzed using *DeSeq2*  
206 1.18.1 (Love et al., 2014) with false discovery rate (*fdr*) correction. RT-qPCR conditions are in in

207 Supplementary Methods. All data visualization used *ggplot2* 3.1.0 unless otherwise noted. To  
208 download all reference data and re-create the transcriptomic analysis herein, refer to:  
209 [https://github.com/levybooth/Rhodococcus\\_Transcriptomics](https://github.com/levybooth/Rhodococcus_Transcriptomics).

#### 210 Phylogenomic characterization

211 Protein sequences were structurally aligned with T-Coffee 11.00 Espresso (Armougom et al.,  
212 2006); maximum-likelihood trees were generated using the best of 100 RAxML 8.0.0 iterations  
213 using the PROTGAMMALG model (Stamatakis, 2014) and visualized with iTOL v4 (Letunic  
214 and Bork, 2016). Genomic island regions were predicted with IslandViewer 4 (Bertelli et al.,  
215 2017; Hsiao et al., 2003). All available *Rhodococcus* genomes (n = 325) were downloaded from  
216 NCBI RefSeq. Genomic alignment with a subset of genomes (Supplementary Table 2) used  
217 *nucmer* 3.1 (Marçais et al., 2018) and visualized with *circlize* 0.4.5 (Gu et al., 2014). Ribosomal  
218 protein trees were constructed as in Hug et al. (2016).

#### 219 Enzyme assays

220 AphAB<sub>EP4</sub> activity was measured spectrophotometrically by following the *meta*-cleavage of the  
221 produced 4-ethylcatechol in a coupled assay with AphC<sub>RHA1</sub> at 25 ± 0.5 °C. The standard assay  
222 was performed in 200µl air- saturated 20 mM MOPS, 90 mM NaCl (*I* = 0.1 mM, pH 7.2)  
223 containing 0.5 mM 4-ethylphenol, 5 µM AphA<sub>EP4</sub>, 1 µM AphB<sub>EP4</sub>, 0.2 µMAphC<sub>RHA1</sub>, 1000 U  
224 mL<sup>-1</sup> of catalase, 1 mM NADH, and 2.5 µM FAD. Components were incubated for 30 s, then the  
225 reaction was initiated by adding NADH and was monitored at 400 nm. Absorbance was  
226 monitored using a Varian Cary 5000 spectrophotometer controlled by WinUV software. One unit  
227 of activity, U, was defined as the amount of enzyme required to hydroxylate of 1 nmol substrate  
228 per minute. Extinction coefficients for methyl-, ethyl-, and propylcatechol cleavage at 400 nm

229 were 18,600, 15,100, 19,400 M<sup>-1</sup> cm<sup>-1</sup>, respectively, calculated by differences in liberation of O<sub>2</sub>  
230 from alkylcatechol cleavage by 0.2 nmol AphC<sub>RHA1</sub> monitored using a Clark- type polarographic  
231 O<sub>2</sub> electrode OXYG1 (Hansatech, Pentney, UK) connected to a circulating water bath. Details of  
232 additional enzyme end point assays are provided in the Supplementary Methods.

## 233 Results

### 234 Isolation and genomic characterization of a 4-ethylphenol-degrading *Rhodococcus* strain

235 Enrichment cultures with 4-ethylphenol as a sole organic growth substrate were inoculated with  
236 either forest soil or compost and incubated at 30°C. Those cultures inoculated with compost  
237 demonstrated superior potential for 4-ethylphenol degradation and were used for subsequent  
238 isolation of strain EP4. The 16S rRNA gene (27F-1492R; Lane, 1991) of EP4 shared 100%  
239 sequence identity with that of *R. rhodochrous* NBRC 16069. *De novo* assembly produced a 5.72-  
240 Mb, high-quality, single-scaffold EP4 genome sequence (Figure 1A) containing 5,198 predicted  
241 genes: 4,942 protein coding sequences, 12 rRNAs, 54 tRNAs, three other RNAs, and 187  
242 pseudogenes. Only a single origin of replication (*oriC*) was found, at 1,863,144 bp, and no  
243 plasmids were detected (Supplementary Table 2). The lack of PacBio long reads overlapping the  
244 5' and 3' genome regions indicated that the EP4 genome is linear.

245 EP4 grew on 1.0 mM 4-ethylphenol to stationary phase within 14 hours in shake flasks (Figure  
246 1B). Growth on 4-ethylphenol was verified by plating CFUs (Figure 1C). GC-MS analysis  
247 indicated that 4-ethylphenol was completely removed from the medium during growth (Figure  
248 1D), with no metabolites detected.



## 249 Quasi-mapping-based quantification of prokaryotic gene expression

250 We used transcriptomics to identify 4-ethylphenol catabolic genes in EP4 without *a priori* bias.  
251 Transcriptome reads were aligned strand-wise to predict transcriptional start sites in the EP4  
252 genome (Figure 2A). Read alignment is a common but time-consuming step in prokaryotic  
253 RNA-Seq pipelines (Supplementary Figure 1A). We therefore compared quasi-mapping to  
254 genomic coding regions using Salmon (Patro et al., 2017) with alignment-based read counting  
255 software. Salmon results were numerically (Supplementary Figure 1B) and statistically  
256 equivalent ( $p_{adj} = 0.21$ ) (Supplementary Figure 1C) to FeatureCounts, with strong correlation to  
257 RT-qPCR expression ( $R^2_{adj} = 0.91$ ,  $p < 0.001$ ) (Supplementary Figure 1D). Salmon was about  
258 eight times faster than FeatureCounts, and superior to htseq in terms of total counts and  
259 accuracy, and was therefore used for gene quantification prior to differential expression analysis  
260 using *DESeq2*.

## 261 Transcriptomic analysis of 4-ethylphenol metabolism via *meta*-cleavage

262 Growth on 4-ethylphenol versus succinate significantly modulated expression of 559 genes with  
263  $p_{fdr} < 0.001$ . Nine of the 16 most upregulated genes occurred in a cluster encoding a proposed  
264 alkylphenol catabolic pathway, *aphABCDEFGHIQRS* (Table 1). This cluster includes *aphAB*,  
265 encoding a two-component alkylphenol hydroxylase discussed below, and *aphC* (Figure 2B),  
266 encoding an extradiol dioxygenase that we subsequently identified as alkylcatechol 2,3-  
267 dioxygenase. The gene cluster is organized as four putative operons based on transcriptomic data  
268 and operon prediction with BPROM: *aphAB*, *aphHIDE*, *aphE2FGS*, *aphG2H2I2* (Figure 2A).  
269 The deduced Aph pathway catabolizes 4-ethylphenol to pyruvate and butyryl-CoA (Figure 2C),  
270 similar to the Dmp pathway of *Pseudomonas* sp. strain CF600 that catabolizes dimethylphenols  
271 (Shingler et al., 1992) and phenol (Powlowski and Shingler, 1994). Based on the transcriptomic

272 data, the resultant butyryl-CoA is degraded to central metabolites by an aerobic fatty acid  
273 degradation pathway (Jimenez-Diaz et al., 2017) encoded by butyryl-CoA dehydrogenase genes  
274 (locus tags: C6369\_RS06395, C6369\_RS20140, C6369\_RS07820, C6369\_RS05465), enoyl-  
275 CoA hydratase (C6369\_RS03325, C6369\_RS19860), 3-hydroxybutyryl-CoA dehydrogenase  
276 (C6369\_RS03325, C6369\_RS06400) and acetyl-CoA acyltransferase (C6369\_RS17095,  
277 C6369\_RS15900, C6369\_RS19850) (Supplementary Figure 2).

278 The *catABC* cluster encoding catechol 1,2-dioxygenase and other enzymes feeding into the  $\beta$ -  
279 ketoadipate pathway was also significantly upregulated during growth on 4-ethylphenol),  
280 although much less highly than the *aph* genes. No *ortho*-cleavage metabolites were detected in  
281 the culture supernatants (Figures 1D), and the genes encoding the downstream  $\beta$ -ketoadipate  
282 pathway, *pcaBLIJ*, were not up-regulated (Figure 2B). Overall, the data suggest that 4-  
283 ethylphenol is catabolized via *meta*-cleavage.

#### 284 [Characterization of a two-component alkylphenol hydroxylase, AphAB](#)

285 We hypothesized that the highly upregulated *aphA* gene ( $L_2FC = 11.5$ ) encodes the oxygenase  
286 component of a novel alkylphenol monooxygenase, based on its location within the *aph* cluster  
287 as well as the phylogenetic and functional data presented below. The *aphB* gene, encoding a  
288 flavin reductase was co-transcribed with *aphA* (Figure 2B). The upregulation of *aphA* and *aphC*  
289 genes in EP4 during growth on 4-ethylphenol was confirmed using RT-qPCR (Supplementary  
290 Figure 3).

291 To establish the physiological role of AphAB from EP4, the oxygenase and reductase  
292 components were each overproduced in *E. coli* and purified to apparent homogeneity. The  
293 reconstituted AphAB<sub>EP4</sub> hydroxylated 4-ethylphenol to 4-ethylcatechol (Figure 3A). The enzyme

294 also catalyzed the hydroxylation of 4-methylphenol, 4-propylphenol (Figure 3B) and, to a much  
295 lesser extent, 4-NP (Figure 3C). However, AphA<sub>EP4</sub> did not detectably transform phenol  
296 (Figure 3B) or 4-HPA (Figure 3C). In an assay measuring cytochrome *c* reduction, AphB<sub>EP4</sub>  
297 preferentially utilized NADH and flavin adenine dinucleotide (FAD) (Figure 3D), as reported for  
298 PheA2 (Gröning et al., 2014; Saa et al., 2010; Straube, 1987).

### 299 Annotation of additional genes

300 During growth of EP4 on 4-ethylphenol, phenol hydroxylase genes, *pheA* and *pheB*, adjacent to  
301 the *cat* gene cluster, were additionally upregulated (Figure 2B, Supplementary Figure 3). In  
302 structure-based alignments, PheA<sub>EP4</sub> and AphA<sub>EP4</sub> clustered with separate 4-NP hydroxylases,  
303 rather than the clade of characterized phenol hydroxylases (Figure 3E). More specifically,  
304 PheA<sub>EP4</sub> and AphA<sub>EP4</sub> clustered most closely, respectively, with NphA1 from *Rhodococcus* sp.  
305 BUBNP1 (WP\_059382681.1) (Sengupta et al., 2019) and NphA1 from *Rhodococcus* sp. PN1  
306 (Q8RQQ0) (Takeo et al., 2003). Despite 100% sequence identity with NphA1<sub>BUBNP1</sub>, PheA<sub>EP4</sub>  
307 was annotated based on sequence similarity to known phenol hydroxylases (Figure 3E). In  
308 support of this annotation, EP4 lacks a 4-NP catabolism gene cluster and was unable to grow on  
309 4-NP, while it did grow on phenol (discussed below). PheA<sub>EP4</sub> shares 82% identity with  
310 PheA1(1) (ABS30825.1) in *Rhodococcus erythropolis* UPV-1 (Saa et al., 2010) and 65% identity  
311 with a chlorophenol 4-monooxygenase (Q8GMG6) from *Streptomyces globisporus* (Liu et al.,  
312 2002) (Supplementary Table 4; Supplementary Figure 4). These similarities suggest that PheA<sub>EP4</sub>  
313 may have broad substrate specificity.

314 In EP4, genes encoding AraC-family transcriptional regulators (TR) were found directly adjacent  
315 to and in the opposite orientation as *aphAB* and *pheAB* (Figure 2A) (Supplementary Figure 5).  
316 These AraC-family TRs were annotated as AphR and PheR, respectively. Another AraC-family

317 TR is encoded by a gene immediately downstream of *aphR*, which has a distinct phylogeny from  
318 AphR (Supplementary Figure 5) and was annotated as AphQ. Finally, an IclR-family TR is  
319 encoded by the last gene of the *aphE2FGS* operon.

#### 320 Syntenic conservation of EP4 *aph* gene cluster in rhodococci

321 The above comparative analyses of hydroxylase proteins revealed homologs of the EP4 *aphA*  
322 gene in several other rhodococci. In RHA1, a putative *aphA* gene (Table 1) was previously  
323 annotated as an aromatic ring hydroxylase possibly involved in steroid degradation (McLeod et  
324 al., 2006) and there were three previously-identified *pheA* homologs (Supplementary Table 4)  
325 (Gröning et al., 2014). Local alignment of the 13 Aph proteins against proteins predicted from all  
326 325 *Rhodococcus* genomes identified 75 strains with full or partial ( $\geq 7$  genes) putative Aph  
327 pathways, including RHA1 (Supplementary Figure 5A). Related pathways were also found in  
328 other Actinobacteria, but this study focused on the rhodococcal pathway. RHA1 *aph* genes  
329 displayed syntenic conservation with the EP4 *aph* cluster (Figure 4), except for an additional  
330 butyryl-CoA dehydrogenase gene (RHA1\_RS18815). The *aphCHIDE* region was conserved in  
331 all *aph*-containing genomes based on *nucmer* alignment (Figure 4, Supplementary Figure 5B).  
332 The EP4 and RHA1 Aph proteins shared 66.7% to 90.4% identity (median = 85.7%). Consistent  
333 with the occurrence of the putative Aph pathway in RHA1, this strain grew on 4-ethylphenol  
334 (Figure 5A), with concomitant upregulation of the *aph* genes (Figure 5B). Specifically, *aphA* and  
335 *aphC*) were highly upregulated ( $L_2FC$ , 14.3 and 10.0, respectively). In contrast to EP4, when  
336 RHA1 grew on 4-ethylphenol, it did not upregulate any of its three *pheA* genes or any of the  
337 ring-cleavage dioxygenase genes associated with the *pheA* genes, including *catA*  
338 (RHA1\_RS11595), *catA2* (RHA1\_RS35920) and a plasmid-borne catechol 2,3-dioxygenase  
339 gene (RHA1\_RS35970) (McLeod et al., 2006) (Figure 5B).

#### 340 Gene deletion analysis of 4-alkylphenol ring cleavage

341 Because RHA1 is genetically-tractable, we constructed  $\Delta aphA$  and  $\Delta aphC$  deletion mutants and  
342 used these together with an existing  $\Delta pcaL$  mutant to further investigate 4-ethylphenol  
343 catabolism. The  $\Delta aphC$  mutant did not grow on either 1.0 mM 4-ethylphenol or 4-propylphenol  
344 (Figure 5AB) demonstrating that both compounds are exclusively metabolised by *meta*-cleavage.  
345 However,  $\Delta aphA$  did grow on 4-ethylphenol (Figure 5A). It appears that one or more of three  
346 PheA homologs from RHA1 may catalyze 4-ethylphenol hydroxylation and compensate for the  
347 deletion of *aphA*. While the corresponding *pheA* genes were not upregulated in wild-type RHA1  
348 growing on 4-ethylphenol versus succinate, they were upregulated 7.6 to 8.8 L<sub>2</sub>FC in the  $\Delta aphA$   
349 mutant (Figure 5B), while the plasmid-borne *C23D* gene was not upregulated. Finally, the  $\Delta pcaL$   
350 mutant grew on alkylphenols but did not grow on either phenol or 4-HBA, indicating that the  
351 latter two substrates are catabolized solely via *ortho*-cleavage pathways (Figure 5C).

#### 352 Identification of a putative *aph* genomic island

353 The *aph* gene cluster (approximately 17 kb) occurs within 117 kb and 4.2 kb regions predicted to  
354 be two of 61 GIs (or 38 non-overlapping GI regions) identified in EP4 using IslandViewer4  
355 (Figure 4; Supplementary Table 2). These GI elements do not include *aphAB* or *aphE* in EP4, but  
356 do in three other *Rhodococcus* strains. These putative GIs are located near the 3' end of the EP4  
357 chromosome assembly in a 600-kb region of apparent genomic instability, as it contains high  
358 insertion sequence (IS) density (Figure 1A) and 36 predicted GIs (Figure 4). The GI-like  
359 characteristics of these elements containing the *aph* cluster include a -5.8% deviation from the  
360 mean GC content, presence of mobility genes (integrases, transposases, insertion sequences) and  
361 absence of the region in closely-related genomes following alignment (Langille et al., 2008)  
362 (Figure 4; Supplementary Figure 6). They are not located near a tRNA sequence, indicating that

363 it is not likely a mobile integrative and conjugative element (ICE) (Burrus and Waldor, 2004).  
364 More generally, 7.4% of the EP4 genome and 9.2% of the RHA1 genome were predicted to  
365 occur on GIs (Supplementary Table 2).

366 Analysis of 37 complete, full-length *Rhodococcus* genomes found that 16 carried genes encoding  
367 a complete Aph pathway. The *aph* genes are predicted to be fully or partially contained in a GI in  
368 six of these strains and to occur immediately downstream of a GI in a seventh, RHA1. This  
369 genomic region was conserved in three *Rhodococcus* clades: one containing EP4 and *R.*  
370 *pyridinivorans* strains, one containing *R. jostii*, *R. opacus* and *Rhodococcus wratislaviensis*  
371 strains and one containing *Rhodococcus* sp. Eu32 (Supplementary Figure 6). With the exception  
372 of a partial *aph* cluster in *R. rhodochrous* ATCC 21198, the *aph* genes were not found in any of  
373 the 13 other *R. rhodochrous* genomes including strain DSM43241. Accordingly, DSM43241  
374 could not grow on 4-ethylphenol and 4-propylphenol, but grew on phenol, 4-HBA, 3-  
375 methylphenol and 4-methylphenol (Figure 5C).

## 376 Discussion

377 In this study, we used a variety of approaches to identify an Aph pathway responsible for the  
378 catabolism of alkylphenols via *meta*-cleavage in *Rhodococcus*. Catabolism is initiated by  
379 AphAB, a two-component hydroxylase that transforms the alkylphenol to the corresponding  
380 alkylcatechol (Figures 2,3). To date, only six-component proteobacterial alkylphenol  
381 hydroxylases have been reported (Arai et al., 2000; Jeong et al., 2003). The ensuing Aph pathway  
382 generates pyruvate and an acyl-CoA following *meta*-cleavage of 4-alkylcatechol. The length of  
383 the acyl-CoA produced depends on the alkyl side chain of the growth substrate. This is in

384 contrast to the Phe and Nph pathways which catabolize phenol and 4-NP, respectively, via *ortho*-  
385 cleavage (Sengupta et al., 2019; Szököl et al., 2014; Takeo et al., 2008) .

386 The activity of AphAB<sub>EP4</sub> is consistent with its phylogenetic relationship with two-component  
387 phenolic hydroxylases. Thus, the clade containing AphA<sub>EP4</sub> and AphA<sub>RHA1</sub> includes an NphA1  
388 but no characterized PheA or HpaB (Figure 3). In keeping with this classification, AphAB<sub>EP4</sub> had  
389 weak activity with 4-NP (Figure 3C) but did not detectably transform phenol or 4-HPA.

390 However, the determinants of substrate specificity of these enzymes are not clear. The catalytic  
391 residues of these hydroxylases (Chang et al., 2016; Kim et al., 2007) are conserved in AphA:  
392 Arg119, Tyr123 and His161 (AphA<sub>EP4</sub> numbering; Supplementary Figure 4). In a structurally  
393 characterized HpaB:4-HPA binary complex, the substrate's carboxylate is coordinated by Ser197  
394 and Thr198 (Kim et al., 2007). In PheA, NphA and AphA, these residues are His214 and Tyr215,  
395 suggesting that they do not contribute to the enzyme's substrate specificity despite their  
396 predicted interaction with the *para*-substituent of the substrate.

397 The Aph pathway is similar to the Dmp pathway described in *Pseudomonas* sp. strain CF600  
398 (Shingler et al., 1992). However, it is clear that the Aph pathway has a distinct substrate  
399 specificity because neither EP4 nor RHA1 grew on 2,4- or 3,4-DMP (Figure 4E) and *aph*  
400 pathway mutants grew on phenol. We had previously suggested that some of the *aph* genes could  
401 be involved in steroid degradation (McLeod et al., 2006) due to their similarity to known steroid  
402 catabolic genes (Van der Geize et al., 2007). Further, in a recently published structure of  
403 AphC<sub>RHA1</sub>, the enzyme was identified as 2,3-dihydroxybiphenyl dioxygenase (Table 1).  
404 However, AphC is encoded in a gene cluster upregulated on 4-alkylphenols and is essential for  
405 growth of RHA1 on those compounds, supporting annotation of this rhodococcal Aph *meta*-  
406 cleavage pathway, with AphC as an alkylcatechol 2,3-dioxygenase.



407 4-Ethylphenol strongly induced *aphAB* expression. This is likely due to positive induction of the  
408 AphR TR, just as phenol activates *pheA2A1* expression by PheR in RHA1 (Szökö et al., 2014),  
409 and 4-NP activates *npaA2A1* expression by NphR in *Rhodococcus* sp. PN1 (Takeo et al., 2008).  
410 AphR, PheR and NphR are all AraC-family TRs. AphR and PheR may play a role in the  
411 unexpected ability of the RHA1  $\Delta$ *aphA* mutant to grow on 4-ethylphenol. The lack of *pheA1-3*  
412 expression in wild-type RHA1 (Figure 5B) strikingly contrasts with the upregulation of these  
413 genes in the  $\Delta$ *aphA* mutant (Figure 5C). Binding regions for PheR<sub>RHA1</sub> and predicted AphR<sub>RHA1</sub>  
414 binding sites overlap by 10/18 nt (Supplementary Figure 5B), suggesting the potential for non-  
415 target regulation, as Szökö et al. (2014) argue for *R. erythropolis* CSM2595 PheR and XylS.  
416 This overlap is much less in predicted PheR<sub>EP4</sub> and AphR<sub>EP4</sub> binding regions (3/18 nt). Indeed,  
417 the *aphA* promoter (-10: CAGGAG; -35: CCGTCT) (Supplementary Figure 5C) bears more  
418 similarity to the T80 promoter of *Mycobacterium tuberculosis* (Bashyam et al., 1996) than with  
419 the rhodococcal *pheA* promoters. It is also noted that two of the *pheA* genes in RHA1 are subject  
420 to catabolite repression (Szökö et al., 2014). It is possible that this repression is relieved in the  
421  $\Delta$ *aphA* mutant that can't metabolise 4-ethylphenol. Related to this, homologs of PheAB in *R.*  
422 *opacus* 1CP hydroxylated 4-methylphenol with about twice the specific activity as with phenol  
423 (Gröning et al., 2014), further suggesting that the RHA1 PheABs may hydroxylate 4-  
424 ethylphenol.

425 In addition to 4-ethylphenol, alkylguaiacols and alkylsyringols commonly occur in lignin  
426 depolymerization streams (Anderson et al., 2016; Asawaworarit et al., 2019; Guo et al., 2017;  
427 Jiang et al., 2014; Kim et al., 2015; Ye et al., 2012). Interestingly, genes encoding a cytochrome  
428 P450 and reductase are linked to the *aph* clusters in some rhodococci (Figures 2,4). Further,  
429 these were the second and third most highly upregulated genes in EP4 during growth on 4-



430 ethylphenol versus succinate (both  $L_2FC = 11.1$ ) (Figure 2B). The P450 shares 65% sequence  
431 identity with a guaiacol *O*-demethylase (Mallinson et al., 2018), suggesting that the rhodococcal  
432 enzyme has a similar role, and that these strains may also funnel methoxylated compounds into  
433 the Aph pathway.

434 The ability of RHA1 and EP4 to catabolize 4-ethylphenol and other alkylphenols is of potential  
435 use in upgrading lignin streams generated by RCF and other depolymerization strategies. The  
436 Aph *meta*-cleavage pathway harboured by these strains contrasts with the *ortho*-cleavage  
437 pathways targeted to date in the design of biocatalysts for lignin valorization (Abdelaziz et al.,  
438 2016; Barton et al., 2018; Beckham et al., 2016). This is largely due to the identified economic  
439 potential of some of the *ortho*-cleavage metabolites. For example, *cis,cis*-muconate resulting  
440 from *ortho*-cleavage can be used to make adipic acid and terephthalic acid (Barton et al., 2018;  
441 Beckham et al., 2016; Xie et al., 2014). However, alkylphenols may be funneled through *ortho*-  
442 cleavage by oxidizing the *para*-side chain to 4-hydroxyacetophenone or hydroquinone (Darby et  
443 al., 1987). Alternatively, oleaginous *Rhodococcus* strains such as RHA1 may be modified to use  
444 the Aph pathway to produce lipid-based commodity chemicals (e.g., Round et al., 2017) offering  
445 a method for valorization of alkylphenols via fatty-acid synthesis in this genus.

446 We found genes encoding the Aph pathway in several *Rhodococcus* strains, including oleaginous  
447 strains such as RHA1 and *R. opacus* B4 (Figure 3A, Figure 4). However, the absence of an *aph*  
448 cluster in most *R. rhodochrous* strains (e.g., DSM43241) demonstrates that phylogenetically-  
449 related strains can have important metabolic differences. Previous studies suggested that recent  
450 horizontal gene transfer did not play a large role in generating RHA1's considerable catabolic  
451 capabilities (McLeod et al., 2006). In several rhodococci, putative GIs did not contain all of the

452 *aph* genes. This could represent the imprecision of the prediction tools, incomplete amelioration  
453 of the element, or reflect that these GIs arose from separate insertion events. Patchwork *aph* GIs  
454 are consistent with the theorized modular origins of GIs (Juhas et al., 2009). Fermentation of  
455 plant-derived aromatic compounds, including cinnamic acids, by yeasts and lactic acid bacteria  
456 can naturally produce alkylphenols (Caboni et al., 2007; Kridelbaugh et al., 2010). The apparent  
457 complete loss of the *aph* genes in other *R. rhodochrous* strains may result without selective  
458 alkylphenol exposure if it otherwise has a deleterious effect on overall fitness. Testing these  
459 regions for their excision capacity was beyond the scope of this work, but remains an intriguing  
460 prospect. We posit that the presence of aromatic compounds in compost selected for  
461 microorganisms capable of 4-ethylphenol catabolism, including EP4.

462 In this study we described a newly-isolated, 4-ethylphenol-catabolizing strain, EP4, a novel  
463 alkylphenol hydroxylase, AphAB, and its role in funneling alkylphenols into the Aph *meta*-  
464 cleavage pathway in some *Rhodococcus* strains. We showed that this pathway is associated with  
465 putative GIs, primarily found in strains from contaminated soil environments. Characterizing 4-  
466 ethylphenol metabolism in EP4 and RHA1 advances our capacity for bio-refinement of  
467 reductively depolymerized lignin subunits from sustainable chemical feedstocks.

## 468 Acknowledgements

469 This study was supported by a research contract from Genome BC (SIP004) and a grant from the  
470 Natural Sciences and Engineering Research Council of Canada (STPGP 506595-17). All  
471 sequencing was performed at the McGill University and Génome Québec Innovation Centre  
472 (Montreal, CAN). We thank Andrew Wilson and Alexandra Booth for their assistance with  
473 laboratory experiments.

474

## 475 References

- 476 Abdelaziz, O.Y., Brink, D.P., Prothmann, J., Ravi, K., Sun, M., García-Hidalgo, J., Sandahl, M.,  
477 Hulteberg, C.P., Turner, C., Lidén, G., Gorwa-Grauslund, M.F., 2016. Biological  
478 valorization of low molecular weight lignin. *Biotechnol. Adv.* 34, 1318–1346.  
479 <https://doi.org/10.1016/j.biotechadv.2016.10.001>
- 480 Alvarez, H.M., Mayer, F., Fabritius, D., Steinbüchel, A., 1996. Formation of intracytoplasmic  
481 lipid inclusions by *Rhodococcus opacus* strain PD630. *Arch. Microbiol.* 165, 377–386.
- 482 Anders, S., Pyl, P.T., Huber, W., 2015. HTSeq—a Python framework to work with high-  
483 throughput sequencing data. *Bioinformatics* 31, 166–169.  
484 <https://doi.org/10.1093/bioinformatics/btu638>
- 485 Anderson, E.M., Katahira, R., Reed, M., Resch, M.G., Karp, E.M., Beckham, G.T., Román-  
486 Leshkov, Y., 2016. Reductive catalytic fractionation of corn stover lignin. *ACS*  
487 *Sustainable Chem. Eng.* 4, 6940–6950. <https://doi.org/10.1021/acssuschemeng.6b01858>
- 488 Arai, H., Ohishi, T., Chang, M.Y., Kudo, T., 2000. Arrangement and regulation of the genes for  
489 *meta*-pathway enzymes required for degradation of phenol in *Comamonas testosteroni*  
490 TA441. *Microbiology (Reading, Engl.)* 146 ( Pt 7), 1707–1715.  
491 <https://doi.org/10.1099/00221287-146-7-1707>
- 492 Armougom, F., Moretti, S., Poirot, O., Audic, S., Dumas, P., Schaeli, B., Keduas, V.,  
493 Notredame, C., 2006. Espresso: automatic incorporation of structural information in  
494 multiple sequence alignments using 3D-Coffee. *Nucleic Acids Res* 34, W604–W608.  
495 <https://doi.org/10.1093/nar/gkl092>

- 496 Asawaworarit, P., Daorattanachai, P., Laosiripojana, W., Sakdaronnarong, C., Shotipruk, A.,  
497 Laosiripojana, N., 2019. Catalytic depolymerization of organosolv lignin from bagasse by  
498 carbonaceous solid acids derived from hydrothermal of lignocellulosic compounds.  
499 Chemical Engineering Journal 356, 461–471. <https://doi.org/10.1016/j.cej.2018.09.048>
- 500 Barton, N., Horbal, L., Starck, S., Kohlstedt, M., Luzhetskyy, A., Wittmann, C., 2018. Enabling  
501 the valorization of guaiacol-based lignin: Integrated chemical and biochemical  
502 production of *cis,cis*-muconic acid using metabolically engineered *Amycolatopsis* sp.  
503 ATCC 39116. Metabolic Engineering 45, 200–210.  
504 <https://doi.org/10.1016/j.ymben.2017.12.001>
- 505 Bashyam, M.D., Kaushal, D., Dasgupta, S.K., Tyagi, A.K., 1996. A study of mycobacterial  
506 transcriptional apparatus: identification of novel features in promoter elements. Journal of  
507 Bacteriology 178, 4847–4853. <https://doi.org/10.1128/jb.178.16.4847-4853.1996>
- 508 Bauchop, T., Elsdén, S.R., 1960. The growth of micro-organisms in relation to their energy  
509 supply. Microbiology 23, 457–469. <https://doi.org/10.1099/00221287-23-3-457>
- 510 Beckham, G.T., Johnson, C.W., Karp, E.M., Salvachúa, D., Vardon, D.R., 2016. Opportunities  
511 and challenges in biological lignin valorization. Current Opinion in Biotechnology,  
512 Chemical biotechnology • Pharmaceutical biotechnology 42, 40–53.  
513 <https://doi.org/10.1016/j.copbio.2016.02.030>
- 514 Bertelli, C., Laird, M.R., Williams, K.P., Lau, B.Y., Hoad, G., Winsor, G.L., Brinkman, F.S.,  
515 2017. IslandViewer 4: expanded prediction of genomic islands for larger-scale datasets.  
516 Nucleic Acids Res 45, W30–W35. <https://doi.org/10.1093/nar/gkx343>
- 517 Boerjan, W., Ralph, J., Baucher, M., 2003. Lignin biosynthesis. Annu Rev Plant Biol 54, 519–  
518 546. <https://doi.org/10.1146/annurev.arplant.54.031902.134938>

- 519 Bolger, A.M., Lohse, M., Usadel, B., 2014. Trimmomatic: a flexible trimmer for Illumina  
520 sequence data. *Bioinformatics* 30, 2114–2120.  
521 <https://doi.org/10.1093/bioinformatics/btu170>
- 522 Bosi, E., Donati, B., Galardini, M., Brunetti, S., Sagot, M.-F., Lió, P., Crescenzi, P., Fani, R.,  
523 Fondi, M., 2015. MeDuSa: a multi-draft based scaffold. *Bioinformatics* 31, 2443–2451.  
524 <https://doi.org/10.1093/bioinformatics/btv171>
- 525 Burrus, V., Waldor, M.K., 2004. Shaping bacterial genomes with integrative and conjugative  
526 elements. *Res. Microbiol.* 155, 376–386. <https://doi.org/10.1016/j.resmic.2004.01.012>
- 527 Caboni, P., Sarais, G., Cabras, M., Angioni, A., 2007. Determination of 4-ethylphenol and 4-  
528 ethylguaiaicol in wines by LC-MS-MS and HPLC-DAD-fluorescence. *J. Agric. Food*  
529 *Chem.* 55, 7288–7293. <https://doi.org/10.1021/jf071156m>
- 530 Carattoli, A., Zankari, E., García-Fernández, A., Voldby Larsen, M., Lund, O., Villa, L., Møller  
531 Aarestrup, F., Hasman, H., 2014. *In silico* detection and typing of plasmids using  
532 PlasmidFinder and plasmid multilocus sequence typing. *Antimicrob. Agents Chemother.*  
533 58, 3895–3903. <https://doi.org/10.1128/AAC.02412-14>
- 534 Carere, J., McKenna, S.E., Kimber, M.S., Seah, S.Y.K., 2013. Characterization of an aldolase-  
535 dehydrogenase complex from the cholesterol degradation pathway of *Mycobacterium*  
536 *tuberculosis*. *Biochemistry* 52, 3502–3511. <https://doi.org/10.1021/bi400351h>
- 537 Chang, C.-Y., Lohman, J.R., Cao, H., Tan, K., Rudolf, J.D., Ma, M., Xu, W., Bingman, C.A.,  
538 Yennamalli, R.M., Bigelow, L., Babnigg, G., Yan, X., Joachimiak, A., Phillips, G.N.,  
539 Shen, B., 2016. Crystal structures of SgcE6 and SgcC, the two-component  
540 monooxygenase that catalyzes hydroxylation of a carrier protein-tethered substrate during

541 the biosynthesis of the enediyne antitumor antibiotic C-1027 in *Streptomyces*  
542 *globisporus*. *Biochemistry* 55, 5142–5154. <https://doi.org/10.1021/acs.biochem.6b00713>

543 Chin, C.-S., Alexander, D.H., Marks, P., Klammer, A.A., Drake, J., Heiner, C., Clum, A.,  
544 Copeland, A., Huddleston, J., Eichler, E.E., Turner, S.W., Korlach, J., 2013. Nonhybrid,  
545 finished microbial genome assemblies from long-read SMRT sequencing data. *Nature*  
546 *Methods* 10, 563–569. <https://doi.org/10.1038/nmeth.2474>

547 DARBY, J.M., TAYLOR, D.G., HOPPER, D.J., 1987. hydroquinone as the ring-fission substrate  
548 in the catabolism of 4-ethylphenol and 4-hydroxyacetophenone by *Pseudomonas putida*  
549 JD1. *Microbiology* 133, 2137–2146. <https://doi.org/10.1099/00221287-133-8-2137>

550 Dobrindt, U., Hochhut, B., Hentschel, U., Hacker, J., 2004. Genomic islands in pathogenic and  
551 environmental microorganisms. *Nature Reviews Microbiology* 2, 414–424.  
552 <https://doi.org/10.1038/nrmicro884>

553 Elder, R.T., 1983. Cloning Techniques. *BioScience* 33, 721–722.  
554 <https://doi.org/10.2307/1309366>

555 Eltis, L.D., Singh, R., 2018. Chapter 11:Biological funneling as a means of transforming lignin-  
556 derived aromatic compounds into value-added chemicals, in: *Lignin Valorization*. pp.  
557 290–313. <https://doi.org/10.1039/9781788010351-00290>

558 Gaillard, M., Vallaeys, T., Vorhölter, F.J., Minoia, M., Werlen, C., Sentchilo, V., Pühler, A.,  
559 Meer, J.R. van der, 2006. The *clc* element of *Pseudomonas* sp. Strain B13, a genomic  
560 island with various catabolic properties. *Journal of Bacteriology* 188, 1999–2013.  
561 <https://doi.org/10.1128/JB.188.5.1999-2013.2006>

562 Geize, R.V. der, Yam, K., Heuser, T., Wilbrink, M.H., Hara, H., Anderton, M.C., Sim, E.,  
563 Dijkhuizen, L., Davies, J.E., Mohn, W.W., Eltis, L.D., 2007. A gene cluster encoding

564 cholesterol catabolism in a soil actinomycete provides insight into *Mycobacterium*  
565 *tuberculosis* survival in macrophages. PNAS 104, 1947–1952.  
566 <https://doi.org/10.1073/pnas.0605728104>

567 Grabherr, M.G., Haas, B.J., Yassour, M., Levin, J.Z., Thompson, D.A., Amit, I., Adiconis, X.,  
568 Fan, L., Raychowdhury, R., Zeng, Q., Chen, Z., Mauceli, E., Hacohen, N., Gnirke, A.,  
569 Rhind, N., di Palma, F., Birren, B.W., Nusbaum, C., Lindblad-Toh, K., Friedman, N.,  
570 Regev, A., 2011. Full-length transcriptome assembly from RNA-Seq data without a  
571 reference genome. Nat Biotech 29, 644–652. <https://doi.org/10.1038/nbt.1883>

572 Gröning, J.A.D., Eulberg, D., Tischler, D., Kaschabek, S.R., Schlömann, M., 2014. Gene  
573 redundancy of two-component (chloro)phenol hydroxylases in *Rhodococcus opacus* 1CP.  
574 FEMS Microbiol Lett 361, 68–75. <https://doi.org/10.1111/1574-6968.12616>

575 Gu, Z., Gu, L., Eils, R., Schlesner, M., Brors, B., 2014. *circlize* Implements and enhances  
576 circular visualization in R. Bioinformatics 30, 2811–2812.  
577 <https://doi.org/10.1093/bioinformatics/btu393>

578 Guo, D., Wu, S., Lyu, G., Guo, H., 2017. Effect of molecular weight on the pyrolysis  
579 characteristics of alkali lignin. Fuel 193, 45–53.  
580 <https://doi.org/10.1016/j.fuel.2016.12.042>

581 Hacker, J., Bender, L., Ott, M., Wingender, J., Lund, B., Marre, R., Goebel, W., 1990. Deletions  
582 of chromosomal regions coding for fimbriae and hemolysins occur in vitro and in vivo in  
583 various extra intestinal *Escherichia coli* isolates. Microbial Pathogenesis 8, 213–225.  
584 [https://doi.org/10.1016/0882-4010\(90\)90048-U](https://doi.org/10.1016/0882-4010(90)90048-U)

585 Hacker, J., Kaper, J.B., 2000. Pathogenicity islands and the evolution of microbes. Annual  
586 Review of Microbiology 54, 641–679. <https://doi.org/10.1146/annurev.micro.54.1.641>

- 587 Hopper, D.J., Cottrell, L., 2003. Alkylphenol biotransformations catalyzed by 4-ethylphenol  
588 methylenehydroxylase. *Appl. Environ. Microbiol.* 69, 3650–3652.  
589 <https://doi.org/10.1128/AEM.69.6.3650-3652.2003>
- 590 Hsiao, W., Wan, I., Jones, S.J., Brinkman, F.S.L., 2003. IslandPath: aiding detection of genomic  
591 islands in prokaryotes. *Bioinformatics* 19, 418–420.  
592 <https://doi.org/10.1093/bioinformatics/btg004>
- 593 Hug, L.A., Baker, B.J., Anantharaman, K., Brown, C.T., Probst, A.J., Castelle, C.J., Butterfield,  
594 C.N., HERNSDORF, A.W., AMANO, Y., ISE, K., SUZUKI, Y., DUDEK, N., RELMAN, D.A.,  
595 FINSTAD, K.M., AMUNDSON, R., THOMAS, B.C., BANFIELD, J.F., 2016. A new view of the tree  
596 of life. *Nature Microbiology* 1, nmicrobiol201648.  
597 <https://doi.org/10.1038/nmicrobiol.2016.48>
- 598 Hunt, M., Silva, N.D., Otto, T.D., Parkhill, J., Keane, J.A., Harris, S.R., 2015. Circlator:  
599 automated circularization of genome assemblies using long sequencing reads. *Genome*  
600 *Biology* 16, 294. <https://doi.org/10.1186/s13059-015-0849-0>
- 601 Jang, J.Y., Kim, D., Bae, H.W., Choi, K.Y., Chae, J.-C., Zylstra, G.J., Kim, Y.M., Kim, E., 2005.  
602 Isolation and characterization of a rhodococcus species strain able to grow on *ortho*- and  
603 *para*-xylene. *J. Microbiol.* 43, 325–330.
- 604 Jeong, J.J., Kim, J.H., Kim, C.-K., Hwang, I., Lee, K., 2003. 3- and 4-alkylphenol degradation  
605 pathway in *Pseudomonas* sp. strain KL28: genetic organization of the lap gene cluster  
606 and substrate specificities of phenol hydroxylase and catechol 2,3-dioxygenase.  
607 *Microbiology* 149, 3265–3277. <https://doi.org/10.1099/mic.0.26628-0>



- 608 Jiang, Z., He, T., Li, J., Hu, C., 2014. Selective conversion of lignin in corncob residue to  
609 monophenols with high yield and selectivity. *Green Chemistry* 16, 4257–4265.  
610 <https://doi.org/10.1039/C4GC00620H>
- 611 Jimenez-Diaz, L., Caballero, A., Segura, A., 2017. Pathways for the degradation of fatty acids in  
612 bacteria, in: Rojo, F. (Ed.), *Aerobic Utilization of Hydrocarbons, Oils and Lipids,*  
613 *Handbook of Hydrocarbon and Lipid Microbiology.* Springer International Publishing,  
614 Cham, pp. 1–23. [https://doi.org/10.1007/978-3-319-39782-5\\_42-1](https://doi.org/10.1007/978-3-319-39782-5_42-1)
- 615 Juhas, M., van der Meer, J.R., Gaillard, M., Harding, R.M., Hood, D.W., Crook, D.W., 2009.  
616 Genomic islands: tools of bacterial horizontal gene transfer and evolution. *FEMS*  
617 *Microbiol Rev* 33, 376–393. <https://doi.org/10.1111/j.1574-6976.2008.00136.x>
- 618 Kim, J.-Y., Park, J., Kim, U.-J., Choi, J.W., 2015. Conversion of lignin to phenol-rich oil  
619 fraction under supercritical alcohols in the presence of metal catalysts. *Energy Fuels* 29,  
620 5154–5163. <https://doi.org/10.1021/acs.energyfuels.5b01055>
- 621 Kim, S.-H., Hisano, T., Takeda, K., Iwasaki, W., Ebihara, A., Miki, K., 2007. Crystal structure  
622 of the oxygenase component (HpaB) of the 4-hydroxyphenylacetate 3-monooxygenase  
623 from *Thermus thermophilus* HB8. *J. Biol. Chem.* 282, 33107–33117.  
624 <https://doi.org/10.1074/jbc.M703440200>
- 625 Kolomytseva, M.P., Baskunov, B.P., Golovleva, L.A., 2007. Intradiol pathway of *para*-cresol  
626 conversion by *Rhodococcus opacus* 1CP. *Biotechnology Journal* 2, 886–893.  
627 <https://doi.org/10.1002/biot.200700013>
- 628 Kridelbaugh, D., Hughes, S., Allen, T., Doerner, K.C., 2010. Production of 4-ethylphenol from  
629 4-hydroxycinnamic acid by *Lactobacillus* sp. isolated from a swine waste lagoon. *Journal*

- 630 of Applied Microbiology 109, 190–198. <https://doi.org/10.1111/j.1365->  
631 [2672.2009.04642.x](https://doi.org/10.1111/j.1365-2672.2009.04642.x)
- 632 Langille, M.G., Hsiao, W.W., Brinkman, F.S., 2008. Evaluation of genomic island predictors  
633 using a comparative genomics approach. BMC Bioinformatics 9, 329.  
634 <https://doi.org/10.1186/1471-2105-9-329>
- 635 Lawrence, J.G., Ochman, H., 1997. Amelioration of bacterial genomes: rates of change and  
636 exchange. J. Mol. Evol. 44, 383–397.
- 637 Letunic, I., Bork, P., 2016. Interactive tree of life (iTOL) v3: an online tool for the display and  
638 annotation of phylogenetic and other trees. Nucleic Acids Res. 44, W242-245.  
639 <https://doi.org/10.1093/nar/gkw290>
- 640 Liao, Y., Smyth, G.K., Shi, W., 2014. featureCounts: an efficient general purpose program for  
641 assigning sequence reads to genomic features. Bioinformatics 30, 923–930.  
642 <https://doi.org/10.1093/bioinformatics/btt656>
- 643 Linger, J.G., Vardon, D.R., Guarnieri, M.T., Karp, E.M., Hunsinger, G.B., Franden, M.A.,  
644 Johnson, C.W., Chupka, G., Strathmann, T.J., Pienkos, P.T., Beckham, G.T., 2014.  
645 Lignin valorization through integrated biological funneling and chemical catalysis. PNAS  
646 111, 12013–12018. <https://doi.org/10.1073/pnas.1410657111>
- 647 Liu, W., Christenson, S.D., Standage, S., Shen, B., 2002. Biosynthesis of the enediyne antitumor  
648 antibiotic C-1027. Science 297, 1170–1173. <https://doi.org/10.1126/science.1072110>
- 649 Love, M.I., Huber, W., Anders, S., 2014. Moderated estimation of fold change and dispersion for  
650 RNA-seq data with DESeq2. Genome Biology 15, 550. [https://doi.org/10.1186/s13059-](https://doi.org/10.1186/s13059-014-0550-8)  
651 [014-0550-8](https://doi.org/10.1186/s13059-014-0550-8)

- 652 Mallinson, S.J.B., Machovina, M.M., Silveira, R.L., Garcia-Borràs, M., Gallup, N., Johnson,  
653 C.W., Allen, M.D., Skaf, M.S., Crowley, M.F., Neidle, E.L., Houk, K.N., Beckham,  
654 G.T., DuBois, J.L., McGeehan, J.E., 2018. A promiscuous cytochrome P450 aromatic *O*-  
655 demethylase for lignin bioconversion. *Nature Communications* 9, 2487.  
656 <https://doi.org/10.1038/s41467-018-04878-2>
- 657 Maltseva, O.V., Solyanikova, I.P., Golovleva, L.A., 1994. Chlorocatechol 1,2-dioxygenase from  
658 *Rhodococcus erythropolis* 1CP. Kinetic and immunochemical comparison with  
659 analogous enzymes from gram-negative strains. *Eur. J. Biochem.* 226, 1053–1061.
- 660 Marçais, G., Delcher, A.L., Phillippy, A.M., Coston, R., Salzberg, S.L., Zimin, A., 2018.  
661 MUMmer4: A fast and versatile genome alignment system. *PLOS Computational*  
662 *Biology* 14, e1005944. <https://doi.org/10.1371/journal.pcbi.1005944>
- 663 McLeod, M.P., Warren, R.L., Hsiao, W.W.L., Araki, N., Myhre, M., Fernandes, C., Miyazawa,  
664 D., Wong, W., Lillquist, A.L., Wang, D., Dosanjh, M., Hara, H., Petrescu, A., Morin,  
665 R.D., Yang, G., Stott, J.M., Schein, J.E., Shin, H., Smailus, D., Siddiqui, A.S., Marra,  
666 M.A., Jones, S.J.M., Holt, R., Brinkman, F.S.L., Miyauchi, K., Fukuda, M., Davies, J.E.,  
667 Mohn, W.W., Eltis, L.D., 2006. The complete genome of *Rhodococcus* sp. RHA1  
668 provides insights into a catabolic powerhouse. *Proc. Natl. Acad. Sci. U.S.A.* 103, 15582–  
669 15587. <https://doi.org/10.1073/pnas.0607048103>
- 670 Nelson, K.E., Weinel, C., Paulsen, I.T., Dodson, R.J., Hilbert, H., Martins dos Santos, V. a. P.,  
671 Fouts, D.E., Gill, S.R., Pop, M., Holmes, M., Brinkac, L., Beanan, M., DeBoy, R.T.,  
672 Daugherty, S., Kolonay, J., Madupu, R., Nelson, W., White, O., Peterson, J., Khouri, H.,  
673 Hance, I., Chris Lee, P., Holtzapple, E., Scanlan, D., Tran, K., Moazzez, A., Utterback,  
674 T., Rizzo, M., Lee, K., Kosack, D., Moestl, D., Wedler, H., Lauber, J., Stjepandic, D.,

- 675 Hoheisel, J., Straetz, M., Heim, S., Kiewitz, C., Eisen, J.A., Timmis, K.N., Düsterhöft,  
676 A., Tümmler, B., Fraser, C.M., 2002. Complete genome sequence and comparative  
677 analysis of the metabolically versatile *Pseudomonas putida* KT2440. *Environ. Microbiol.*  
678 4, 799–808.
- 679 Nordlund, I., Shingler, V., 1990. Nucleotide sequences of the meta-cleavage pathway enzymes  
680 2-hydroxymuconic semialdehyde dehydrogenase and 2-hydroxymuconic semialdehyde  
681 hydrolase from *Pseudomonas* CF600. *Biochim. Biophys. Acta* 1049, 227–230.
- 682 Patrauchan, M.A., Florizone, C., Dosanjh, M., Mohn, W.W., Davies, J., Eltis, L.D., 2005.  
683 Catabolism of benzoate and phthalate in *Rhodococcus* sp. strain RHA1: redundancies and  
684 convergence. *Journal of Bacteriology* 187, 4050–4063.  
685 <https://doi.org/10.1128/JB.187.12.4050-4063.2005>
- 686 Patro, R., Duggal, G., Love, M.I., Irizarry, R.A., Kingsford, C., 2017. Salmon provides fast and  
687 bias-aware quantification of transcript expression. *Nature Methods* 14, 417–419.  
688 <https://doi.org/10.1038/nmeth.4197>
- 689 Pepper, J.M., Lee, Y.W., 1969. Lignin and related compounds. I. A comparative study of  
690 catalysts for lignin hydrogenolysis. *Can. J. Chem.* 47, 723–727.  
691 <https://doi.org/10.1139/v69-118>
- 692 Pollard, J.R., Bugg, T.D., 1998. Purification, characterisation and reaction mechanism of  
693 monofunctional 2-hydroxypentadienoic acid hydratase from *Escherichia coli*. *Eur. J.*  
694 *Biochem.* 251, 98–106.
- 695 Pouyssegur, J., Stoeber, F., 1974. Genetic control of the 2-keto-3-deoxy-d-gluconate metabolism  
696 in *Escherichia coli* K-12: *kdg* regulon. *J. Bacteriol.* 117, 641–651.

- 697 Powlowski, J., Shingler, V., 1994. Genetics and biochemistry of phenol degradation by  
698 *Pseudomonas* sp. CF600. *Biodegradation* 5, 219–236.
- 699 Ragauskas, A.J., Beckham, G.T., Bidy, M.J., Chandra, R., Chen, F., Davis, M.F., Davison,  
700 B.H., Dixon, R.A., Gilna, P., Keller, M., Langan, P., Naskar, A.K., Saddler, J.N.,  
701 Tschaplinski, T.J., Tuskan, G.A., Wyman, C.E., 2014. Lignin valorization: improving  
702 lignin processing in the biorefinery. *Science* 344, 1246843.  
703 <https://doi.org/10.1126/science.1246843>
- 704 Round, J., Rocco, R., Li, S.-N., Eltis, L.D., 2017. A fatty acyl coenzyme a reductase promotes  
705 wax ester accumulation in *Rhodococcus jostii* RHA1. *Appl. Environ. Microbiol.* 83,  
706 e00902-17. <https://doi.org/10.1128/AEM.00902-17>
- 707 Saa, L., Jaureguibeitia, A., Largo, E., Llama, M.J., Serra, J.L., 2010. Cloning, purification and  
708 characterization of two components of phenol hydroxylase from *Rhodococcus*  
709 *erythropolis* UPV-1. *Appl Microbiol Biotechnol* 86, 201–211.  
710 <https://doi.org/10.1007/s00253-009-2251-x>
- 711 Sambrook, J., W. Russel, D., 2001. *Molecular Cloning: A Laboratory Manual*(3rd edition).
- 712 Sengupta, K., Swain, M.T., Livingstone, P.G., Whitworth, D.E., Saha, P., 2019. Genome  
713 sequencing and comparative transcriptomics provide a holistic view of 4-nitrophenol  
714 degradation and concurrent fatty acid catabolism by *Rhodococcus* sp. Strain BUPNP1.  
715 *Front. Microbiol.* 9. <https://doi.org/10.3389/fmicb.2018.03209>
- 716 Shields-Menard, S.A., AmirSadeghi, M., Green, M., Womack, E., Sparks, D.L., Blake, J.,  
717 Edelmann, M., Ding, X., Sukhbaatar, B., Hernandez, R., Donaldson, J.R., French, T.,  
718 2017. The effects of model aromatic lignin compounds on growth and lipid accumulation

- 719 of *Rhodococcus rhodochrous*. International Biodeterioration & Biodegradation 121, 79–  
720 90. <https://doi.org/10.1016/j.ibiod.2017.03.023>
- 721 Shingler, V., Powlowski, J., Marklund, U., 1992. Nucleotide sequence and functional analysis of  
722 the complete phenol/3,4-dimethylphenol catabolic pathway of *Pseudomonas* sp. strain  
723 CF600. J. Bacteriol. 174, 711–724.
- 724 Stamatakis, A., 2014. RAxML version 8: a tool for phylogenetic analysis and post-analysis of  
725 large phylogenies. Bioinformatics 30, 1312–1313.  
726 <https://doi.org/10.1093/bioinformatics/btu033>
- 727 Straube, G., 1987. Phenol hydroxylase from *Rhodococcus* sp. P 1. Journal of Basic Microbiology  
728 27, 229–232. <https://doi.org/10.1002/jobm.3620270415>
- 729 Szököl, J., Rucká, L., Šimčíková, M., Halada, P., Nešvera, J., Pátek, M., 2014. Induction and  
730 carbon catabolite repression of phenol degradation genes in *Rhodococcus erythropolis*  
731 and *Rhodococcus jostii*. Appl Microbiol Biotechnol 98, 8267–8279.  
732 <https://doi.org/10.1007/s00253-014-5881-6>
- 733 Takeo, M., Murakami, M., Niihara, S., Yamamoto, K., Nishimura, M., Kato, D., Negoro, S.,  
734 2008. Mechanism of 4-nitrophenol oxidation in *Rhodococcus* sp. strain PN1:  
735 characterization of the two-component 4-nitrophenol hydroxylase and regulation of its  
736 expression. J. Bacteriol. 190, 7367–7374. <https://doi.org/10.1128/JB.00742-08>
- 737 Takeo, M., Yasukawa, T., Abe, Y., Niihara, S., Maeda, Y., Negoro, S., 2003. Cloning and  
738 characterization of a 4-nitrophenol hydroxylase gene cluster from *Rhodococcus* sp. PN1.  
739 J. Biosci. Bioeng. 95, 139–145.
- 740 Tsuda, M., Iino, T., 1990. Naphthalene degrading genes on plasmid NAH7 are on a defective  
741 transposon. Mol. Gen. Genet. 223, 33–39.

- 742 Xie, N.-Z., Liang, H., Huang, R.-B., Xu, P., 2014. Biotechnological production of muconic acid:  
743 current status and future prospects. *Biotechnology Advances* 32, 615–622.  
744 <https://doi.org/10.1016/j.biotechadv.2014.04.001>
- 745 Yam, K.C., van der Geize, R., Eltis, L.D., 2010. Catabolism of aromatic compounds and steroids  
746 by *Rhodococcus*, in: Alvarez, H.M. (Ed.), *Biology of Rhodococcus*, Microbiology  
747 Monographs. Springer Berlin Heidelberg, Berlin, Heidelberg, pp. 133–169.  
748 [https://doi.org/10.1007/978-3-642-12937-7\\_6](https://doi.org/10.1007/978-3-642-12937-7_6)
- 749 Ye, Y., Zhang, Y., Fan, J., Chang, J., 2012. Novel method for production of phenolics by  
750 combining lignin extraction with lignin depolymerization in aqueous ethanol. *Ind. Eng.*  
751 *Chem. Res.* 51, 103–110. <https://doi.org/10.1021/ie202118d>
- 752

753 **Tables**

754 Table 1. Genes in the alkylphenol *meta*-cleavage pathway

| Gene        | EP4 <sup>a</sup> | RHA1 <sup>b</sup> | Product <sup>c</sup>                                    | Best Hit <sup>d</sup>                                        | % ID <sup>e</sup> | Ref.                           |
|-------------|------------------|-------------------|---------------------------------------------------------|--------------------------------------------------------------|-------------------|--------------------------------|
| <i>aphA</i> | RS01585          | RS18785           | Alkylphenol hydroxylase, oxygenase                      | 4-Nitrophenol 2-monooxygenase, oxygenase (NphA1) Q8RQQ0      | 87                | Takeo et al. (2003)            |
| <i>aphB</i> | RS01580          | RS18780           | Alkylphenol hydroxylase, reductase                      | NADH-dependent flavin reductase (NphB1) Q8RQP9               | 81                | Takeo et al. (2003)            |
| <i>aphC</i> | RS01550          | RS18750           | Alkylcatechol 2,3-dioxygenase                           | Biphenyl-2,3-diol 1,2-dioxygenase (BphC) <sup>f</sup> Q0S9X1 | 87                | PDB entry, unpublished         |
| <i>aphD</i> | RS01565          | RS18765           | 5-Alkyl-2-hydroxy-muconate-6-semialdehyde dehydrogenase | 4-hydroxymuconic-semialdehyde dehydrogenase (DmpC) P19059    | 45                | Nordlund and Shingler (1990)   |
| <i>aphE</i> | RS01575, RS01600 | RS18775, RS18820  | 5-Alkyl-2-hydroxymuconate tautomerase                   | 2-hydroxymuconate tautomerase (DmpI) P49172                  | 38                | Shingler et al. (1992)         |
| <i>aphF</i> | RS01605          | RS18825           | Enol 5-alkyl-2-oxalocrotonate decarboxylase             | 4-oxalocrotonate decarboxylase (NahK, DmpH) Q1XGK3           | 85                | Tsuda and Iino (1990)          |
| <i>aphG</i> | RS01610          | RS18830           | 2-Keto-4-alkylpentenoate hydratase                      | 2-keto-4-pentenoate hydratase (MhpD) P77608                  | 42                | Pollard and Bugg (1998)        |
| <i>aphH</i> | RS01560          | RS18760           | 4-Hydroxy-2-alkylketopentenoate aldolase                | 4-hydroxy-2-oxovalerate aldolase (DmpG, MhpE) P51016         | 48                | Shingler et al. (1992)         |
| <i>aphI</i> | RS01555          | RS18755           | Alkylacetaldehyde dehydrogenase                         | Acetaldehyde dehydrogenase (HsaG, MphF) P9WQH3               | 57                | Carere et al. (2013)           |
| <i>aphR</i> | RS01590          | RS18790           | Aph transcriptional regulator                           | AraC family Transcriptional regulator Q88H39                 | 39                | Nelson et al. (2002)           |
| <i>aphQ</i> | RS01595          | RS18810           | Aph transcriptional regulator                           | AraC family Transcriptional regulator Q88H39                 | 36                | Nelson et al. (2002)           |
| <i>aphS</i> | RS01615          | RS18835           | Aph transcriptional regulator                           | IclR family transcriptional regulator Q0SH23                 | 31                | Pouyssegur and Stoeber, (1974) |

755 <sup>a</sup>Locus in EP4 (C6369\_RSXXXXXX).

756 <sup>b</sup>Locus in RHA1 (RHA1\_RSXXXXXX).

757 <sup>c</sup>Where “alkyl” represents the variable-length 4-alkyl side chain.

758 <sup>d</sup>Gene name and Uniprot identifier of closest characterized homolog.

759 <sup>e</sup>Percent identity of best hit and EP4 homolog determined by Clustal Omega alignment.



760 <sup>f</sup>Also annotated as catechol 2,3-dioxygenase (DmpB)

## 761 Figure Legends

762 Figure 1. Isolation and growth of 4-ethylphenol-catabolizing strain *Rhodococcus rhodochrous*  
763 EP4. A) Schematic of EP4 isolation from compost on 4-ethylphenol, which is produced from  
764 reductive lignin depolymerization. Outer genomic track: coding sequences by strand; Inner track:  
765 insertion sequences; lines: GC content (%). MC, *meta*-cleavage pathway gene cluster; OC,  
766 *ortho*-cleavage pathway gene cluster. B) Growth of EP4 on 1 mM 4-ethylphenol or 2 mM  
767 succinate controls as optical density at 600 nm (OD<sub>600</sub>). Points and error bars reflect mean and  
768 standard error (n = 3). C) Colony forming units (CFU) during growth in Panel B. Points and  
769 horizontal bar indicate individual measurements and mean. D) Removal of 4-ethylphenol and  
770 succinate in EP4 cultures by GC/MS.

771  
772 Figure 2. Transcriptomic and genomic identification of the 4-ethylphenol catabolic pathway  
773 genes in *Rhodococcus rhodochrous* EP4. A) RNA reads from cells grown on 4-ethylphenol or  
774 succinate mapped to the EP4 gene clusters encoding catechol *meta*-cleavage and *ortho*-cleavage.  
775 B) *Deseq2* differential-expression analysis showing log<sub>2</sub> fold-change (FC) on 4-ethylphenol  
776 versus succinate (FDR-corrected p-values: \* p<sub>fdr</sub> < 0.001). Points show values for n = 3  
777 replicates; horizontal bar indicates mean. P450, cytochrome P450 gene; Red., P450 reductase. C)  
778 Proposed funneling of 4-ethylphenol into the alkylcatechol *meta*-cleavage pathway (upper) and  
779 not the catechol *ortho*-cleavage pathway (lower). TCA, tricarboxylic acid cycle.

780

781 Figure 3. Characterization of AphAB<sub>EP4</sub>. A) Phylogenetic tree constructed using structural-based  
782 alignment and RAxML. B) Hydroxylation of 4-ethylphenol to 4-ethylcatechol by purified

783 AphAB<sub>EP4</sub>. Reaction mixtures contained 20  $\mu$ M of each enzyme component, 100  $\mu$ M substrate,  
784 and were incubated overnight. C) Specific activity of AphAB<sub>EP4</sub> for select phenols. Activity was  
785 measured using a coupled, spectrophotometric assay. D) Transformation of 4-HPA and 4-NP by  
786 AphAB<sub>EP4</sub>. Conditions as in C. E) Cofactor and substrate preference of AphB<sub>EP4</sub>. Reductase  
787 activity was measured using cytochrome *c*. HPA; hydroxyphenylacetate; NP, nitrophenol; FAD,  
788 flavin adenine dinucleotide; FMN, flavin mononucleotide; RF, riboflavin.

789

790 Figure 4. Identification of a putative *aph* genomic island in rhodococci. A) Alignment of  
791 *Rhodococcus* genomes to EP4 reference with *nucmer* ordered by RAxML tree calculated from  
792 concatenated alignment of 16 ribosomal protein sequences; predicted RHA1 genomic islands;  
793 GC content (%); and syntentic organization of *aph* gene clusters showing genomic islands  
794 predicted using IslandViewer4. *Nucmer* alignment regions shown with dashed line. *aphA*, 4-  
795 alkylphenol 3-monooxygenase, oxygenase gene; *aphB*, 4-alkylphenol 3-monooxygenase,  
796 reductase gene; *aphC*, alkylcatechol 2,3-dioxygenase gene; *bph*, biphenyl catabolism gene  
797 cluster; P450, cytochrome P450 gene; Red., P450 reductase. The single origin of replication  
798 (*oriC*) shown with orange diamond. Detail of the *aph* region alignments in Supplementary Figure  
799 6B.

800

801 Figure 5. Molecular genetic analysis of 4-ethylphenol catabolism in RHA1. A) Growth of WT,  
802  $\Delta$ *aphA* and  $\Delta$ *aphCI* RHA1 strains on 1 mM 4-ethylphenol or 2 mM succinate. B) Protein yield  
803 of WT,  $\Delta$ *aphC*, and  $\Delta$ *pcaL* RHA1 strains as well as EP4 and *R. rhodochrous* DSM43241 on  
804 phenolic substrates. Protein measured after 24 hours incubation. C) Expression of select genes in  
805 WT and  $\Delta$ *aphA* RHA1 strains during growth on 1 mM 4-ethylphenol or 2 mM succinate using

806 RT-qPCR. Colors indicate cleavage pathway. Points and horizontal bars show individual  
807 measurements ( $n = 3$ ) and mean. Significance levels following Bonferroni-corrected two-tailed  
808 Student's t-tests (\*,  $p_{\text{bon}} < 0.05$ ; \*\*,  $p_{\text{bon}} < 0.01$ ; \*\*\*,  $p_{\text{bon}} < 0.001$ ). DMP, dimethylphenol; EP,  
809 ethylphenol; HBA, hydroxybenzoic acid; HPA; hydroxyphenylacetate; MP, methylphenol; NP,  
810 nitrophenol; PP, propylphenol.

811

## 812 [Supplementary Figure Captions](#)

813 [Supplementary Figure 1](#). Quantitative mapping of prokaryotic RNASeq reads. A) Compute time  
814 in seconds for read mapping steps for three methods of feature quantification: FeatureCounts  
815 (FC), HTSeq and Salmon. Timing benchmarks calculated on a 256 Gb, 32-core Ubuntu 14.04.5  
816 server, running eight cores per analysis. B) Total counts produced by each method. C) PCoA  
817 ordination of read counts of all genomic features with results of pairwise PERMANOVA. D)  
818 Linear regression of RNASeq method against RT-qPCR transcript abundance showing  $R^2_{\text{adj}}$ .  
819 All  $p$ -values  $< 0.0001$ . 4-EP, 4-ethylphenol; 4-PG, 4-propylguaiacol; S, succinate. Full 4-PG  
820 results can be found in a separate manuscript (Fetherolf et al., unpublished).

821

822 [Supplementary Figure 2](#). Transcriptomic analysis of the metabolism of butyryl-CoA produced  
823 from 4-ethylphenol catabolism by the Aph pathway in EP4. The top panel shows the predicted  
824 pathway of metabolism showing the production of the acyl-CoA during the final step of the Aph  
825 pathway. The bottom panels show plots of  $-\log_{10}$  transformed  $p$ -values plotted against  $\log_2$  fold  
826 change for all putative homologs of the genes encoding each step of acyl-CoA metabolism  
827 during growth on 1.0 mM 4-ethylphenol versus succinate calculated using *DeSeq2*.

828

829 Supplementary Figure 3. RT-qPCR expression of *aphA*, *aphC*, *pheA*, *catA* and *sigF* (control)  
830 genes during growth of EP4 on 1 mM 4-ethylphenol (EP), 2 mM succinate (S) and 1 mM  
831 benzoate. N = 3, log<sub>10</sub> gene copies ng<sup>-1</sup> total RNA). Table shows log<sub>2</sub> fold change and *p*-value  
832 following Bonferroni-corrected two-tailed Student's t-tests: \*, *p*<sub>bon</sub> < 0.05, \*\*, *p*<sub>bon</sub> < 0.01.

833

834 Supplementary Figure 4. TCoffee-Expresso-based structure alignment of EP4 AphA and select  
835 homolog amino acid sequences. See Figure 3 for sequence identification.

836

837 Supplementary Figure 5. Investigating the role of AphR in *aphAB* expression. A) RAxML-tree  
838 from TCoffee-aligned AraC-family transcriptional regulatory proteins. Red indicates previously  
839 identified proteins. B) Alignment of EP4 and RHA *aphA*-AphR and *pheA*-PheR binding regions;  
840 inset: organization of EP4 and RHA1 *aphBAR* and *pheRBA* genes. D) Map of the *aphR-aphA*  
841 intergenic region showing the AphR binding site predicted from alignment with CCM2595 PheR  
842 binding regions (yellow, dotted underline), *aphA* promoters (solid underline), *aphA*  
843 transcriptional start site (TSS) (purple) and predicted coding start (CS) (pink). Strains:  
844 ATCC39116, *Amycolatopsis* sp. ATCC39116; BUPNP1, *Rhodococcus* sp. BUPNP1; CCM2595,  
845 *Rhodococcus erythropolis* CCM2595; KL28, *Pseudomonas* sp. KL28.

846

847 Supplementary Figure 6. The *aph* cluster in *Rhodococcus* genomes. A) RAxML phylogenetic  
848 tree calculated from MUSCLE alignment of concatenated sequences for ribosomal proteins L2,  
849 L3, L4, L5, L6, L14, L16, L18, L22, L24, S3, S8, S10, S17 and S19 from 325 *Rhodococcus* ssp.  
850 genomes showing genomes for which BLASTp values were < 10<sup>-100</sup> for at least 7 of the 13 EP4

851 Aph amino acid sequences (gold boxes). Also showing the *Rhodococcus*  
852 *opacus/jostii/wratislaviensis* clade (green), *Rhodococcus rhodochrous/pyradinivorans* clade  
853 (gold), and *Rhodococcus* sp. Eu-32 (peach). B) Detail from Figure 4 showing *nucmer* alignment  
854 of select *Rhodococcus* genomes to the EP4 *aph* gene cluster including a portion of the 117-kb  
855 *aph* gene-containing genomic island predicted using IslandViewer4 (grey), showing *nucmer*  
856 aligned regions (black dashed lines), median GC content (red dashed line) and GC content in 200  
857 bp segments (solid grey line).  
858  
859

# A Lignin

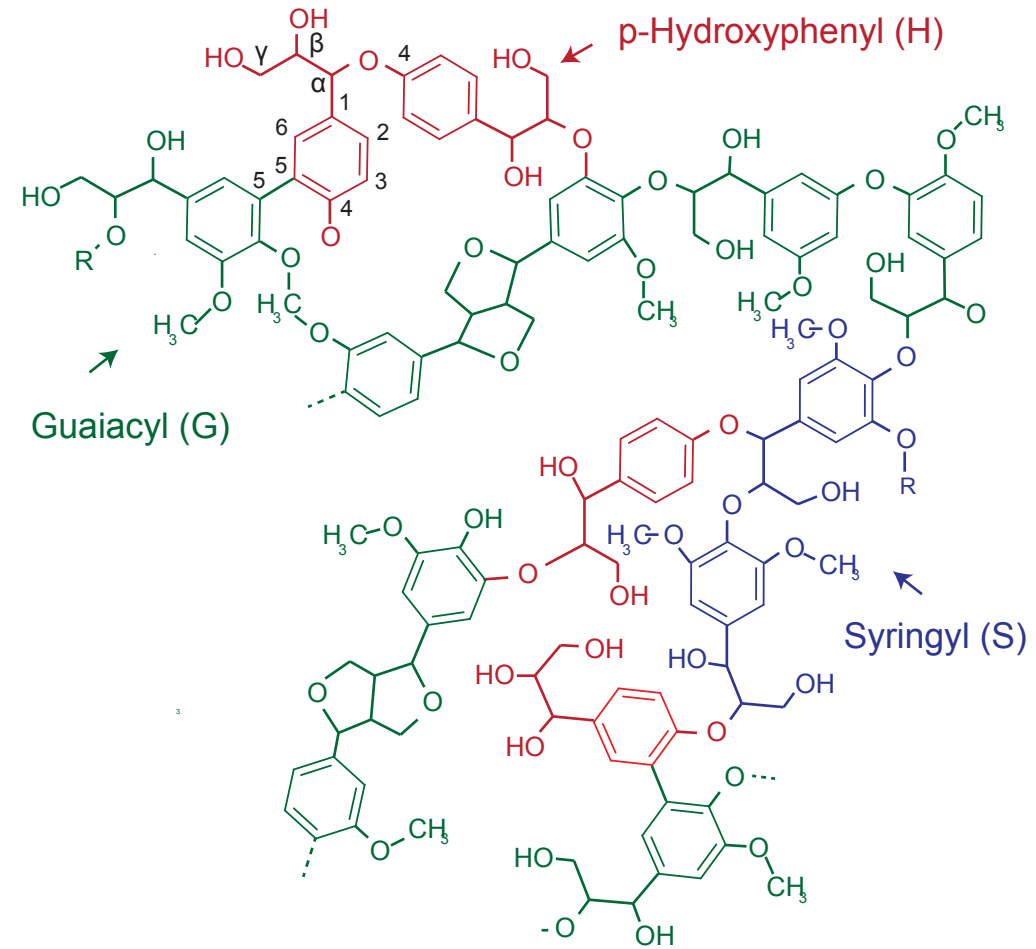

# Rhodococcus rhodochrous EP4 isolation and genome sequencing

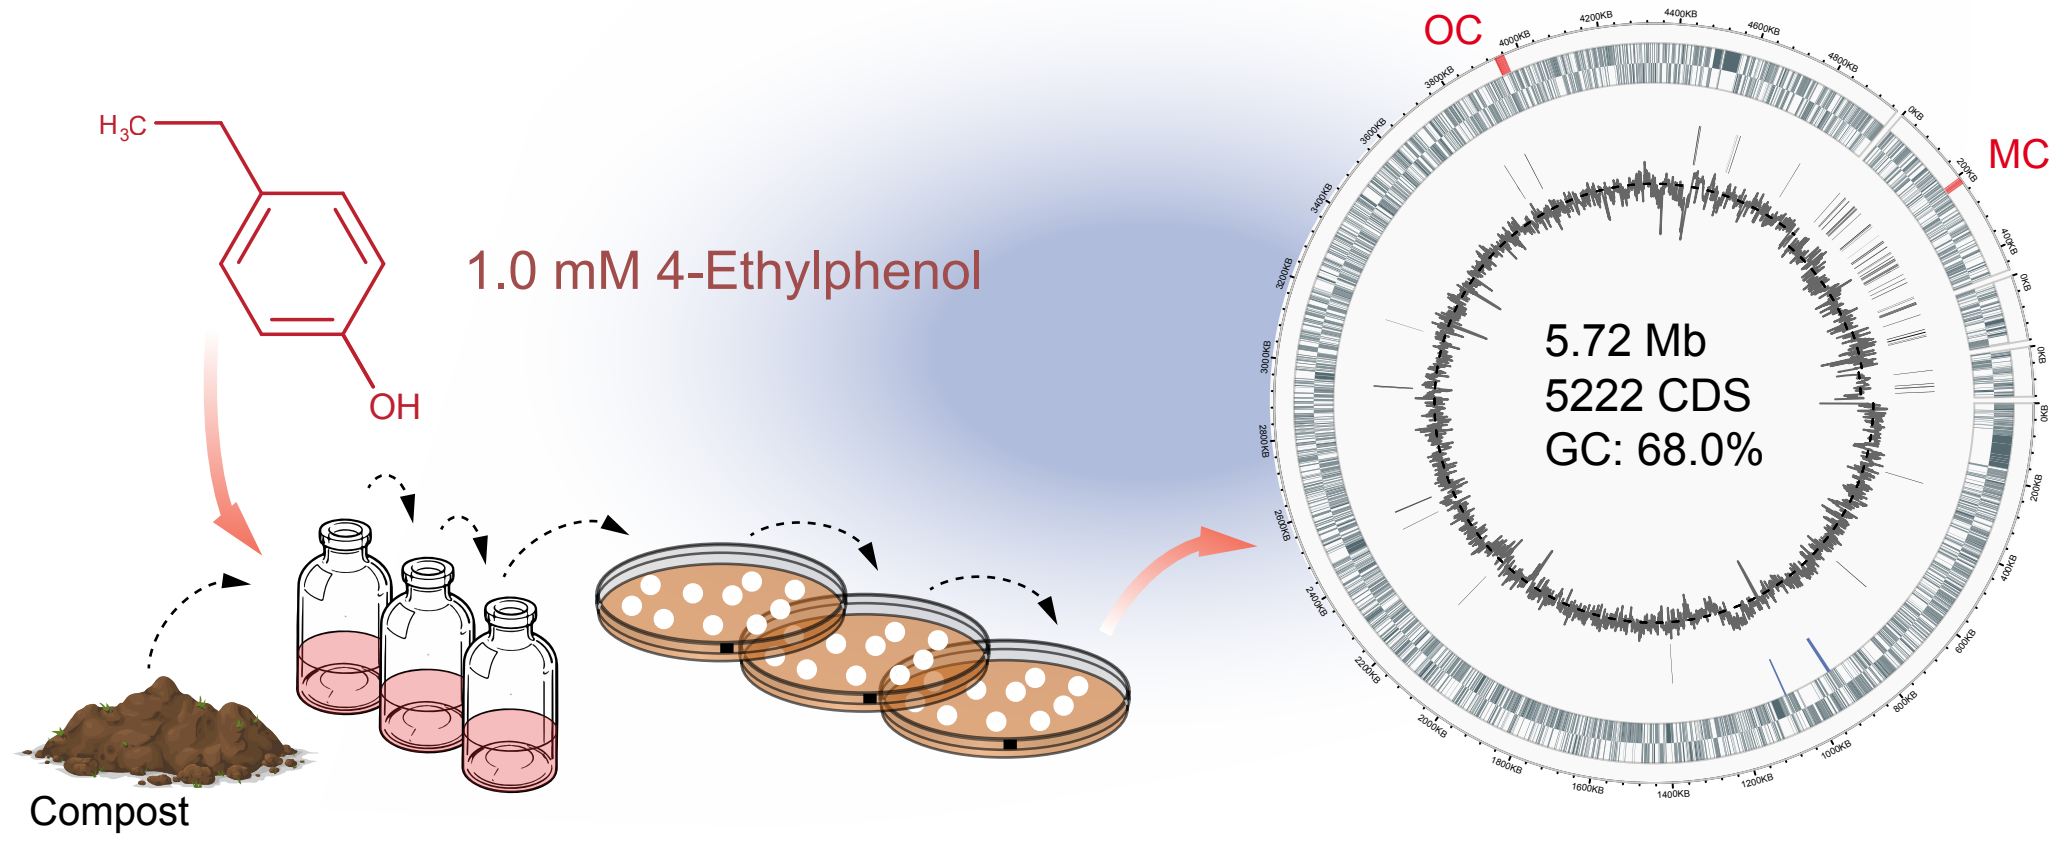

## B

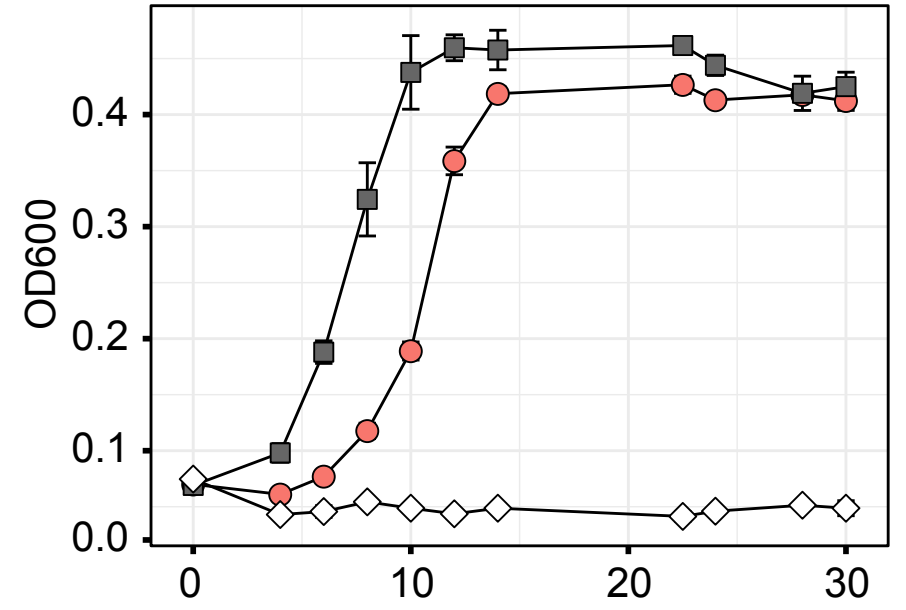

## C

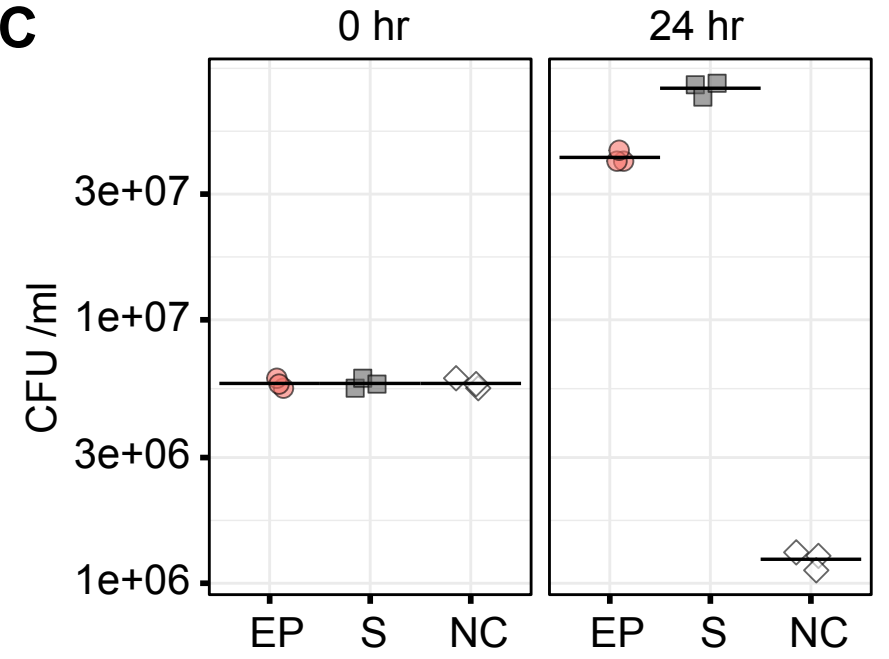

## D

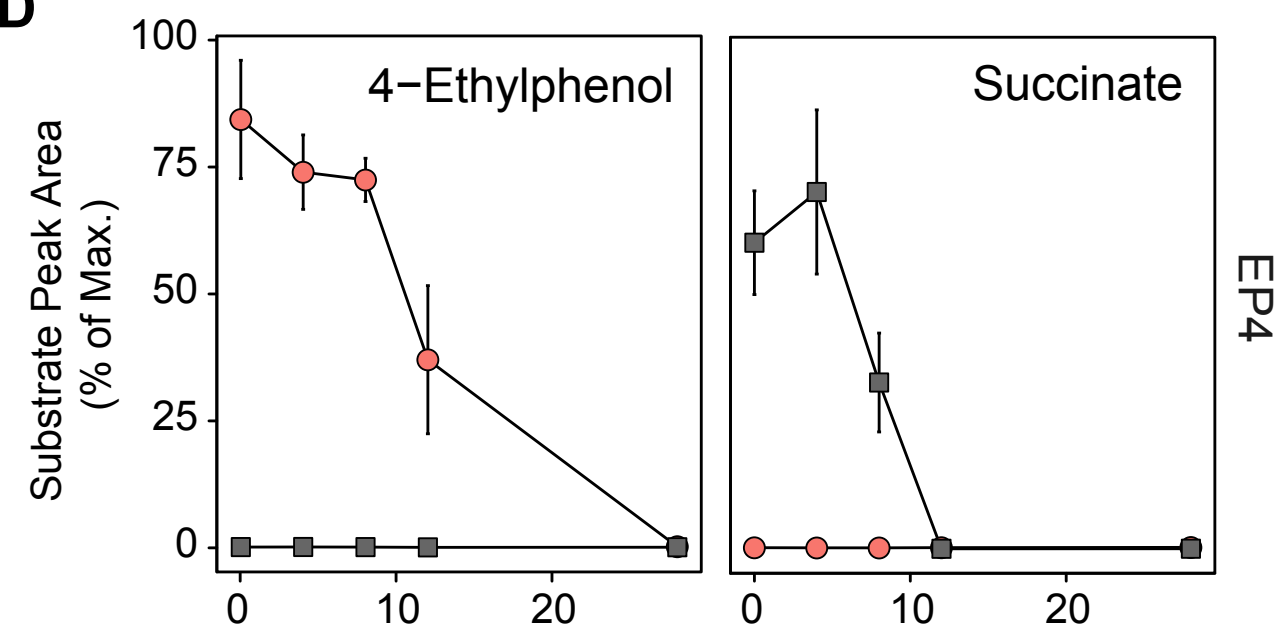

EP4

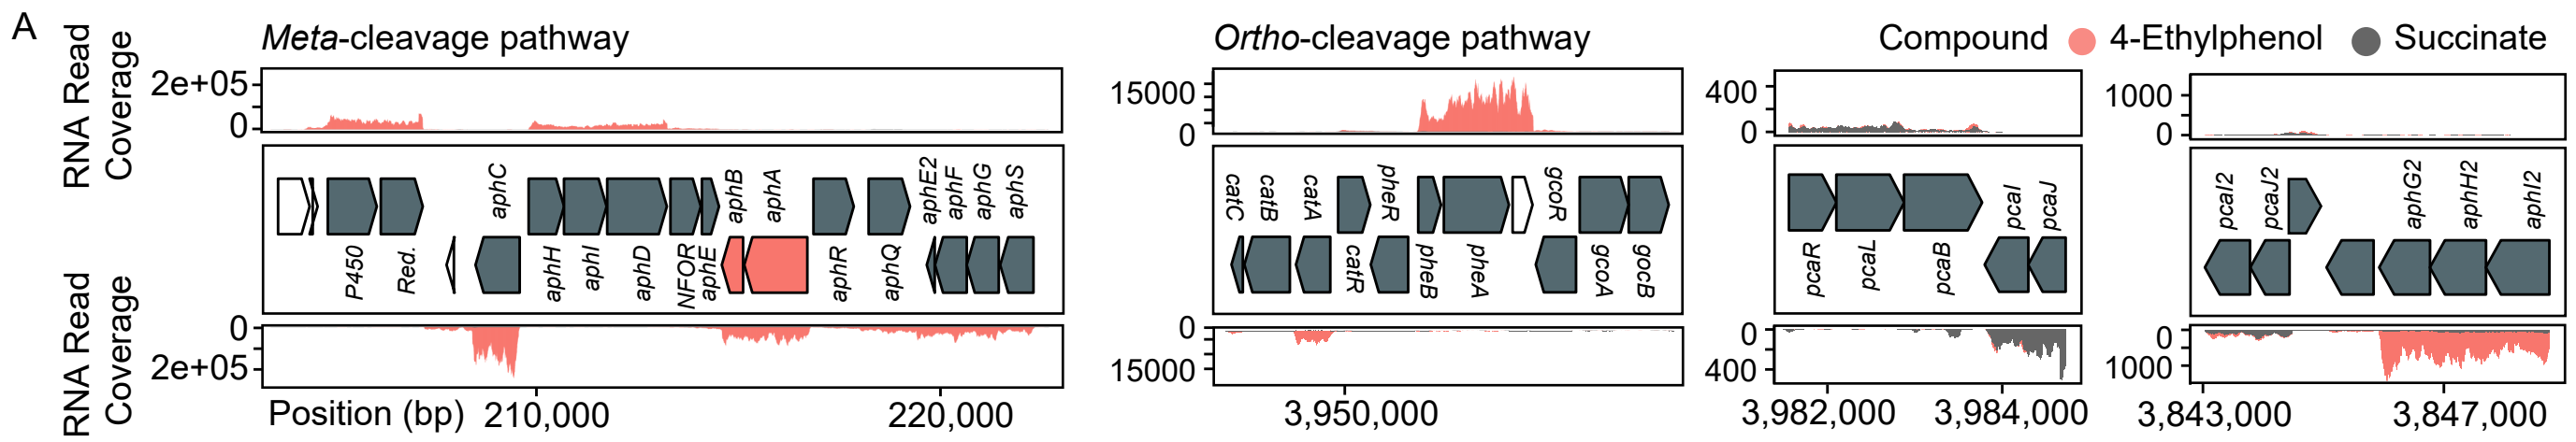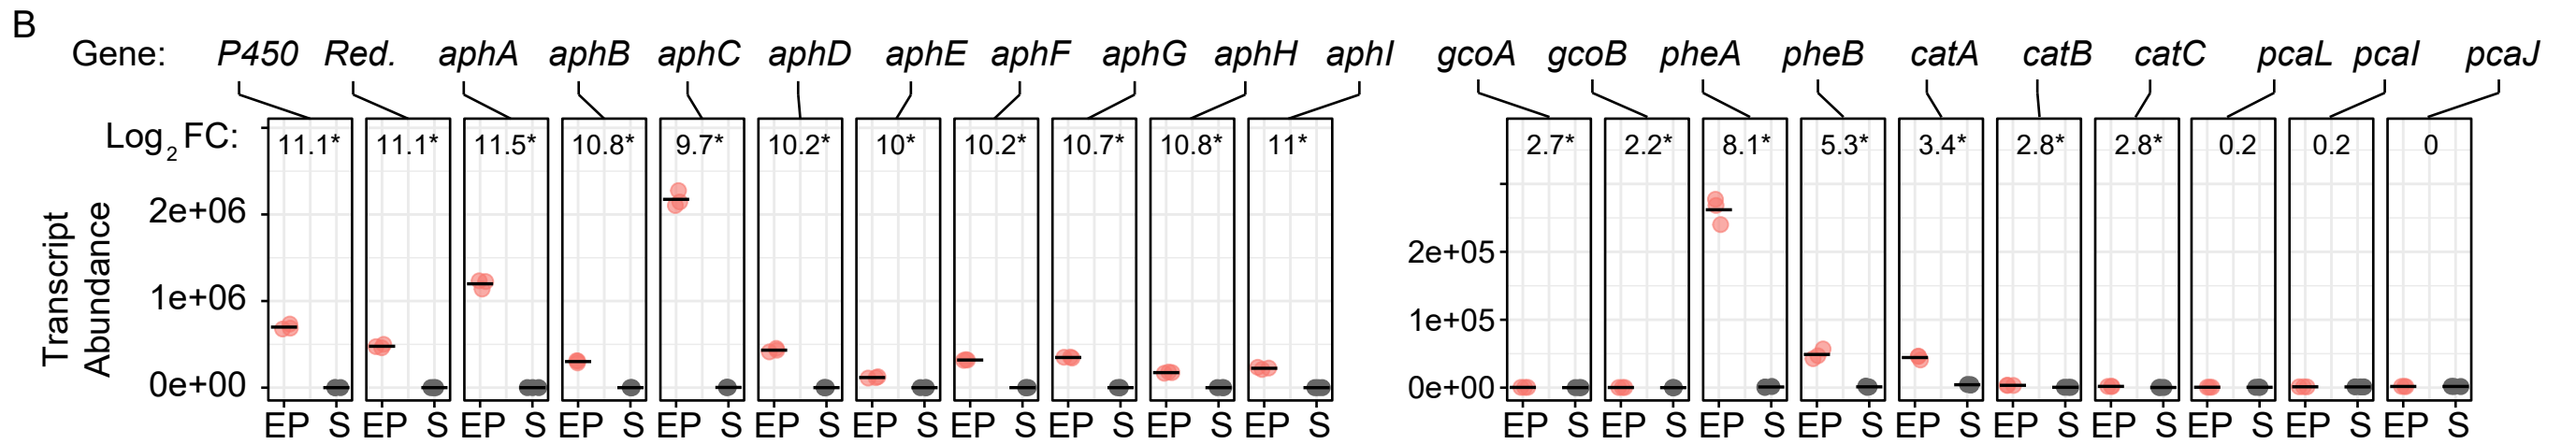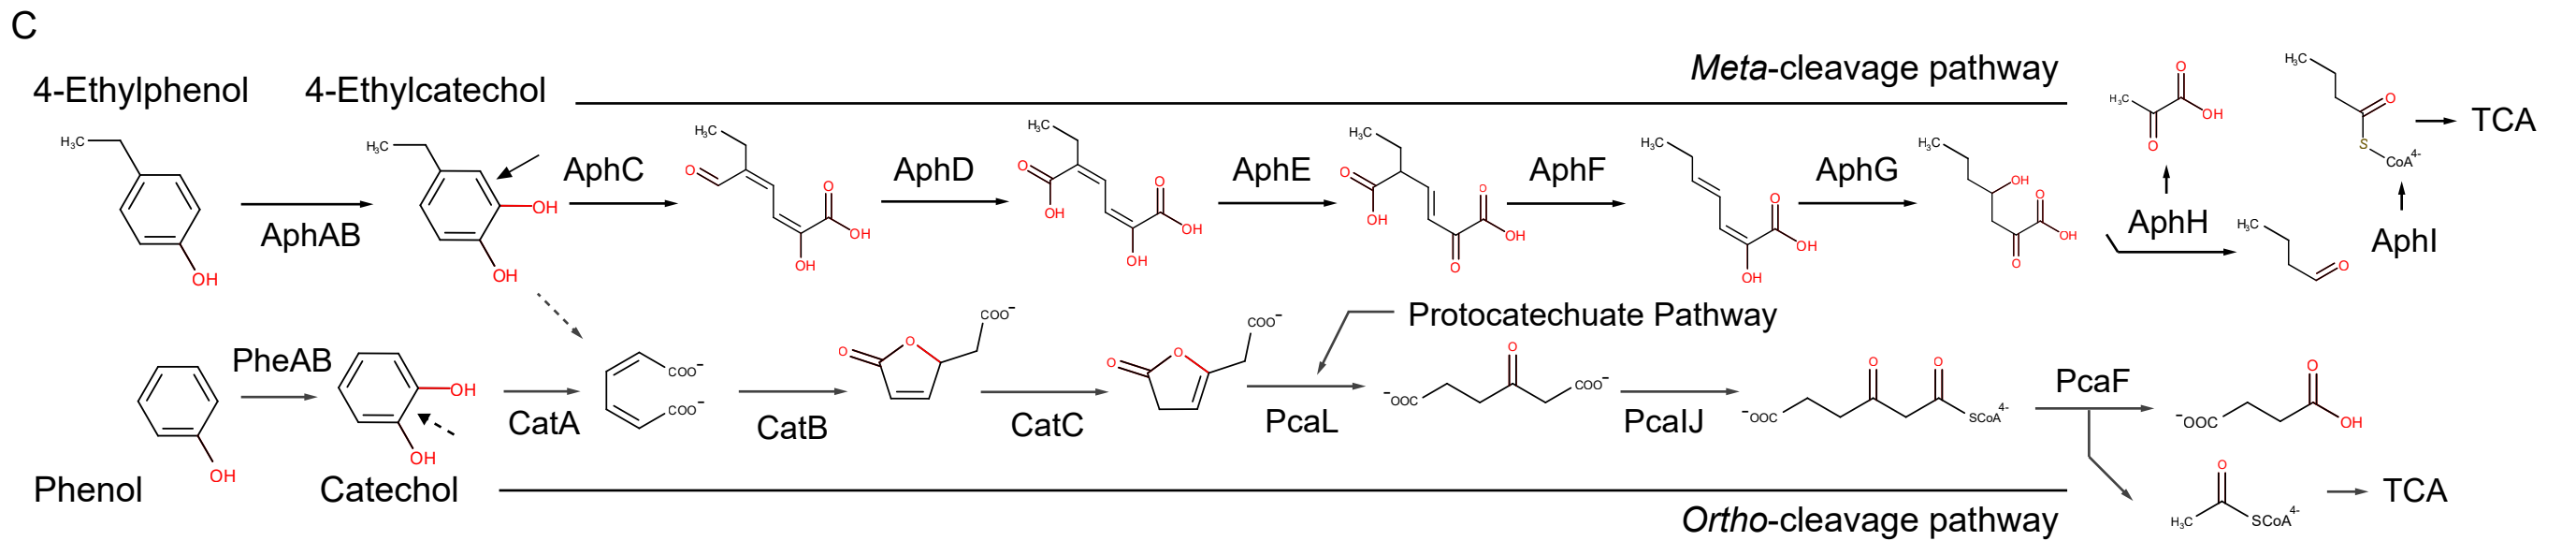



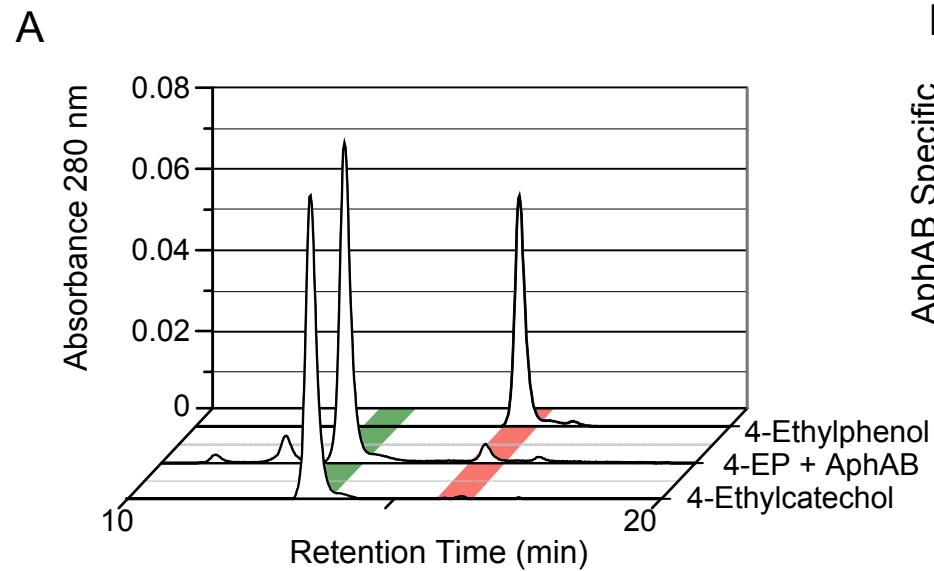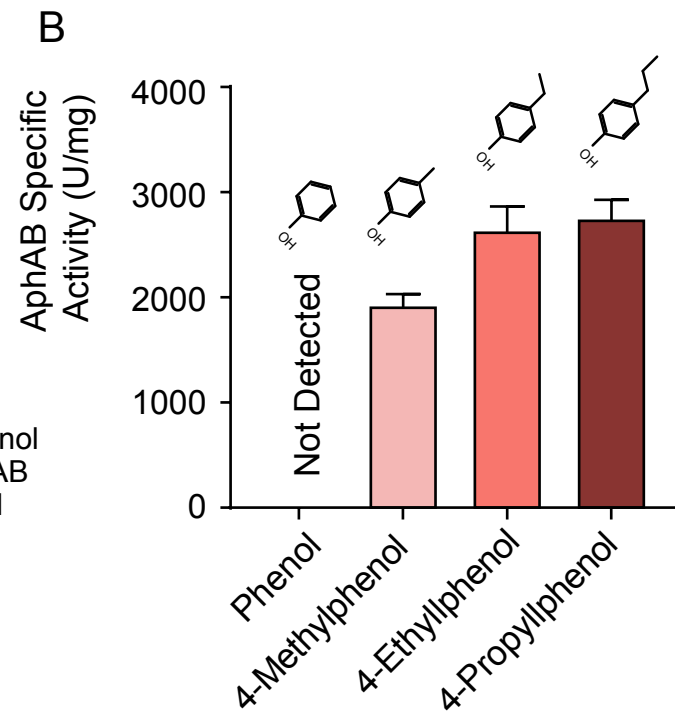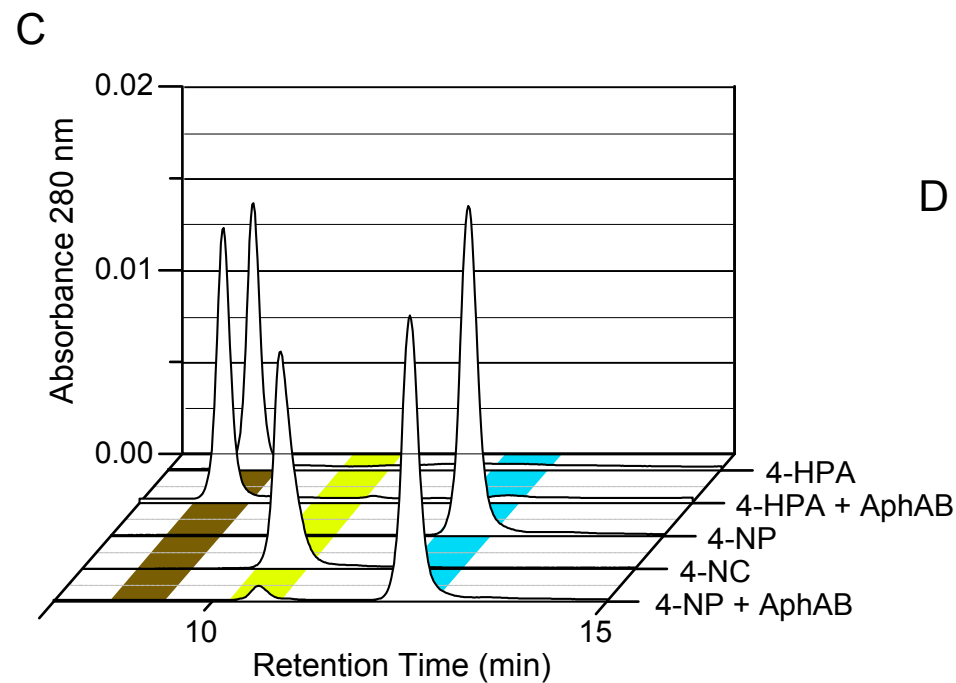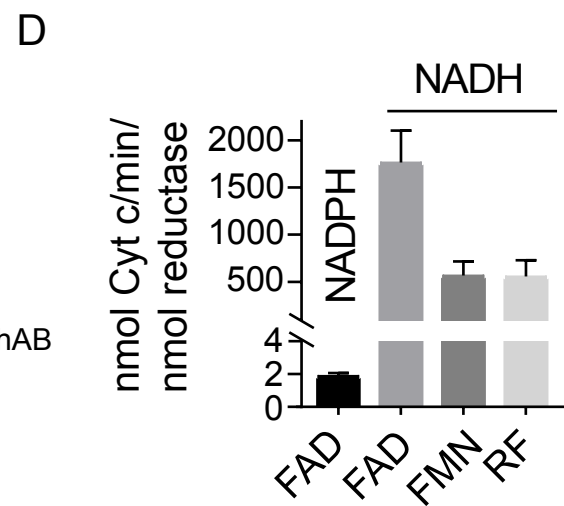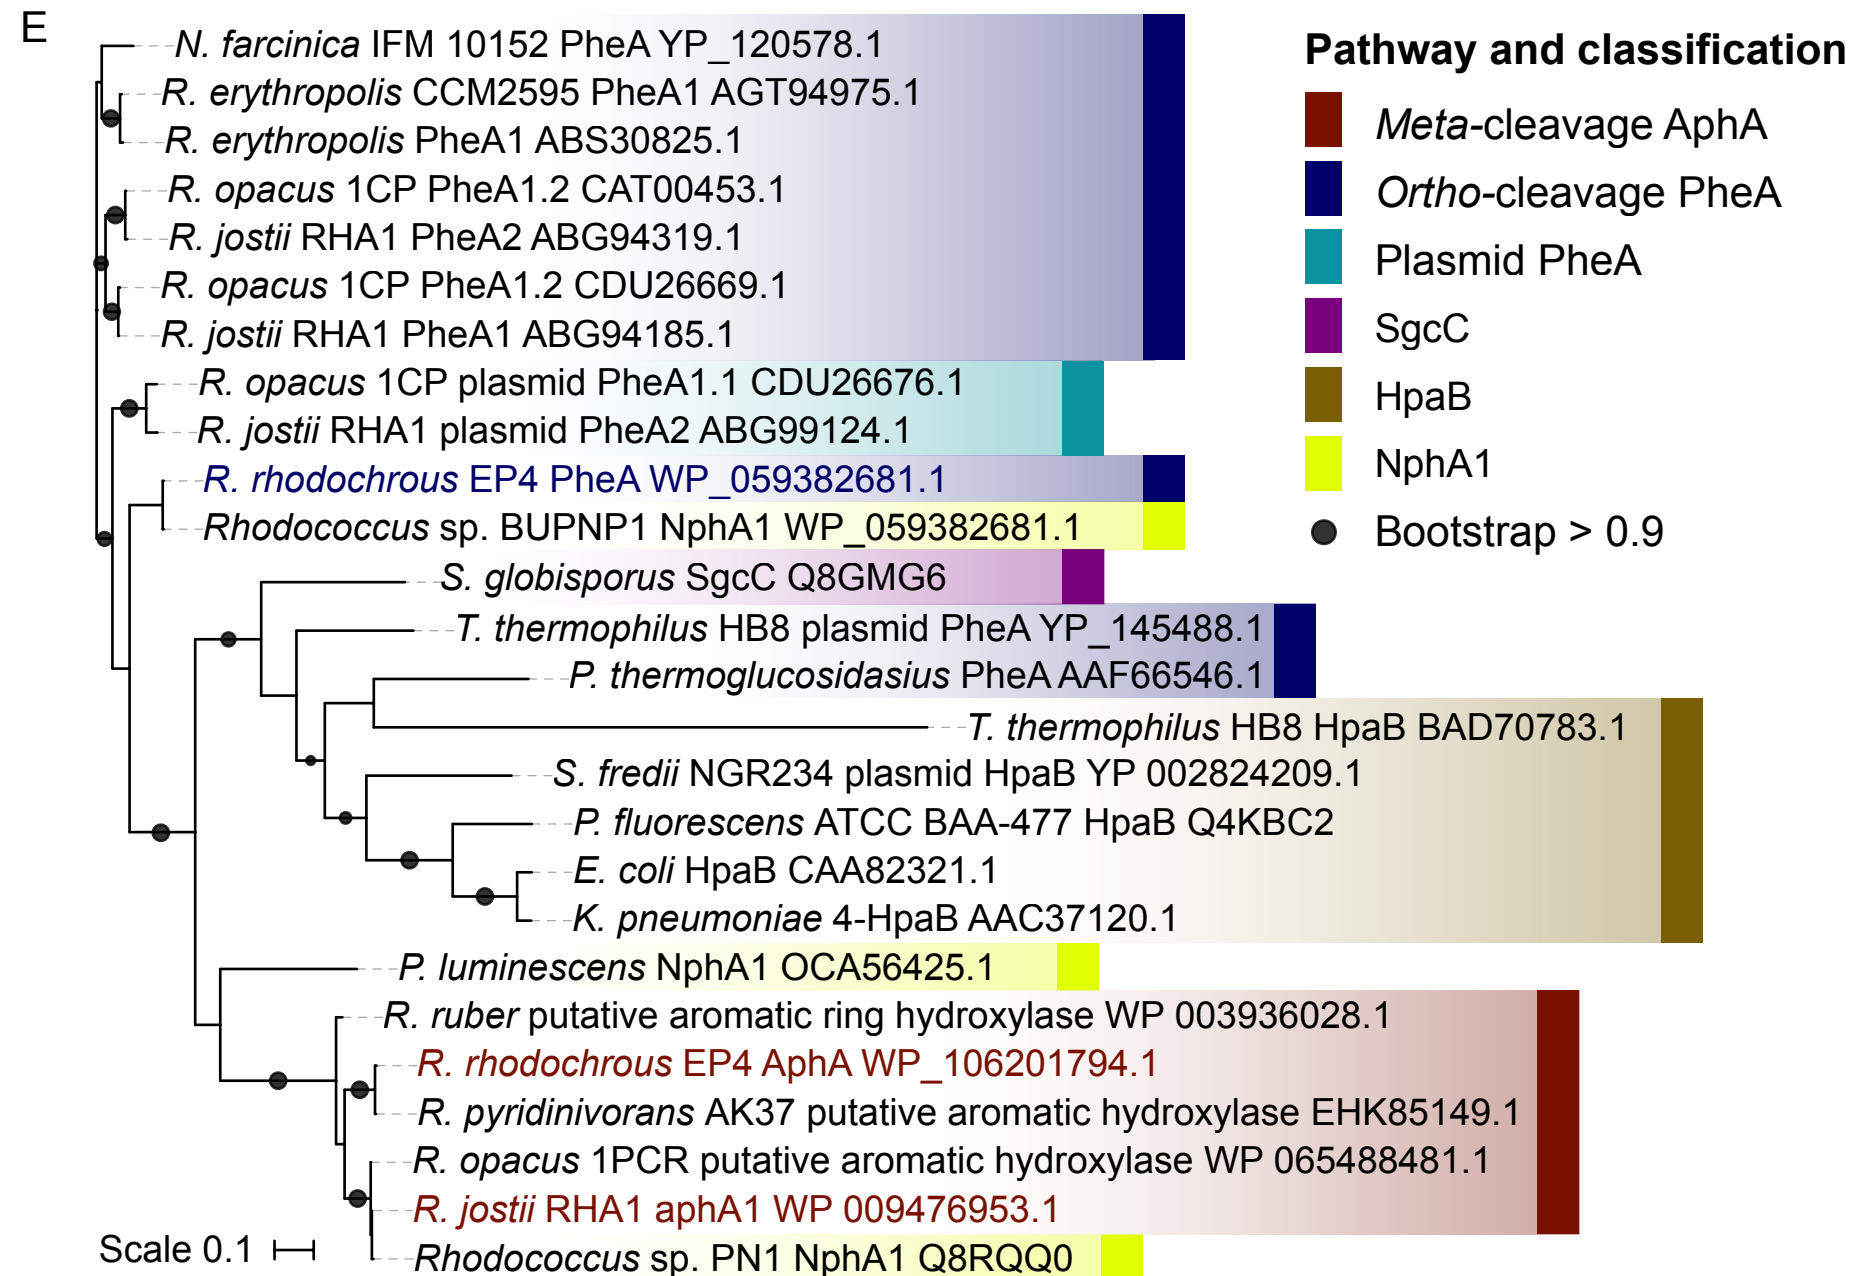



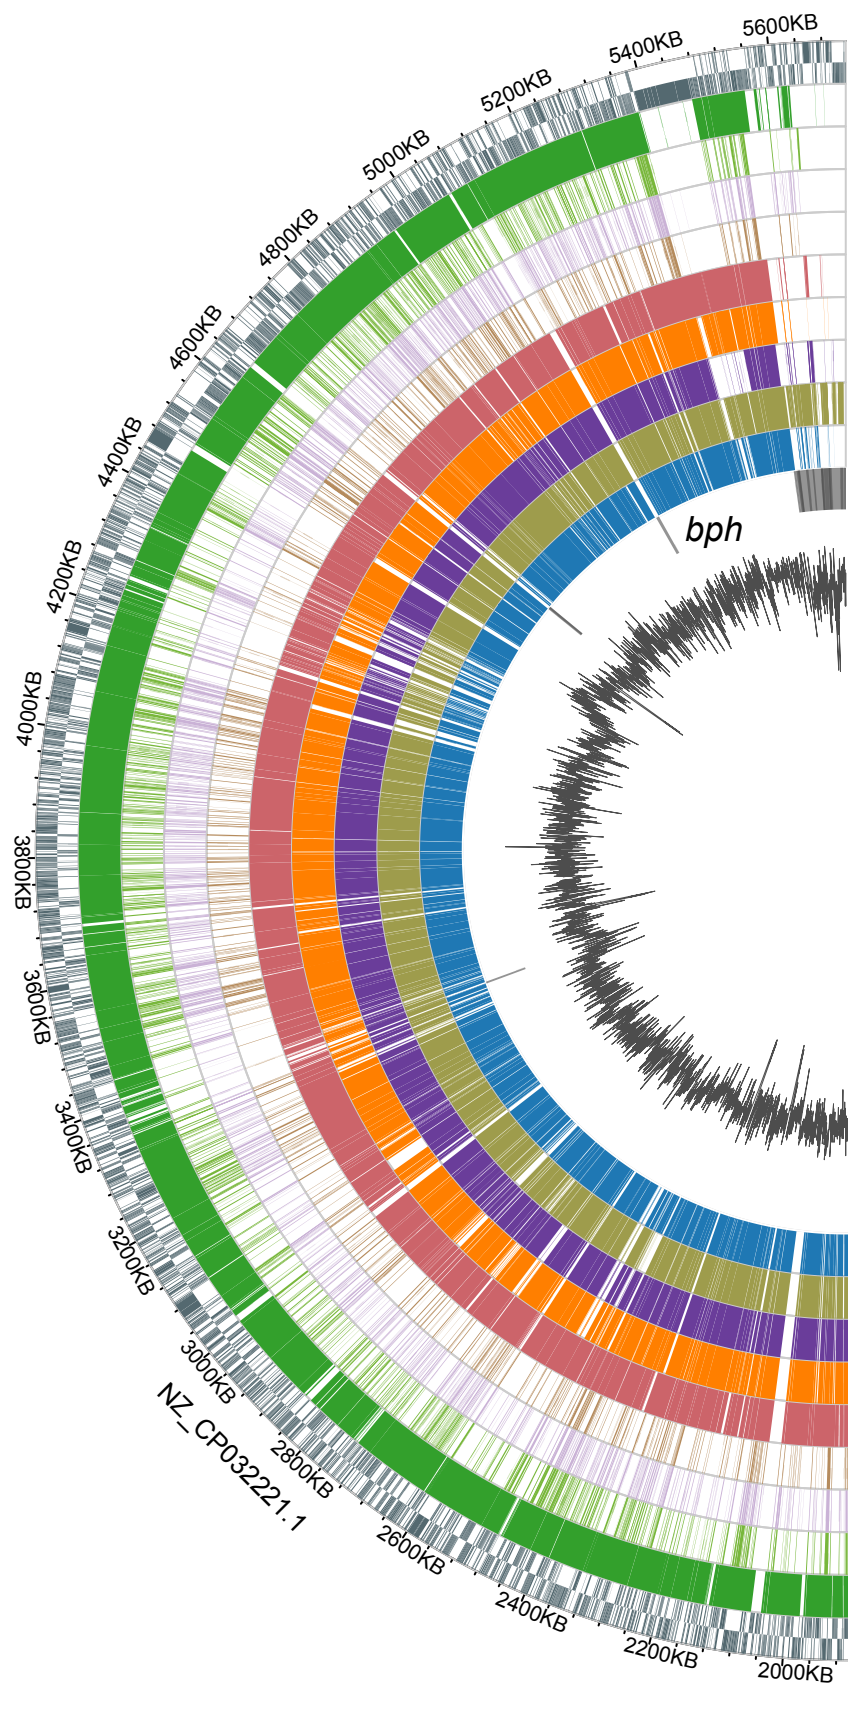

- R. rhodochrous* EP4
- R. rhodochrous* DSM43241
- R. jostii* RHA1
- R. opacus* B4
- R. erythropolis* CCM2595
- Rhodococcus* sp. BUPNP1
- R. pyridinivorans* SB3094
- Rhodococcus* sp. 2G
- R. biphenylivorans* TG9
- Rhodococcus* sp. p52

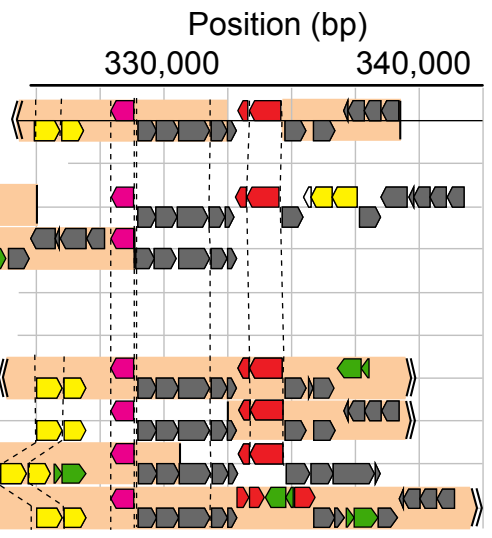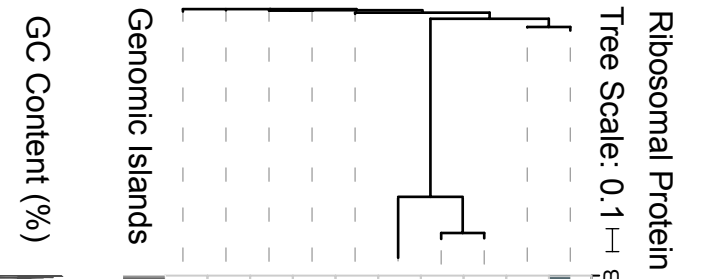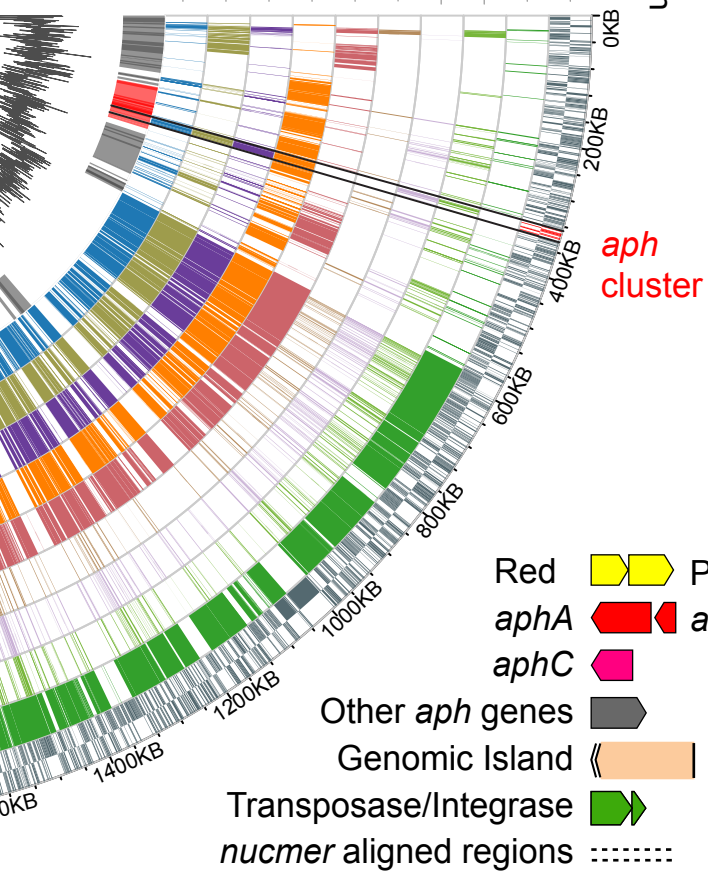

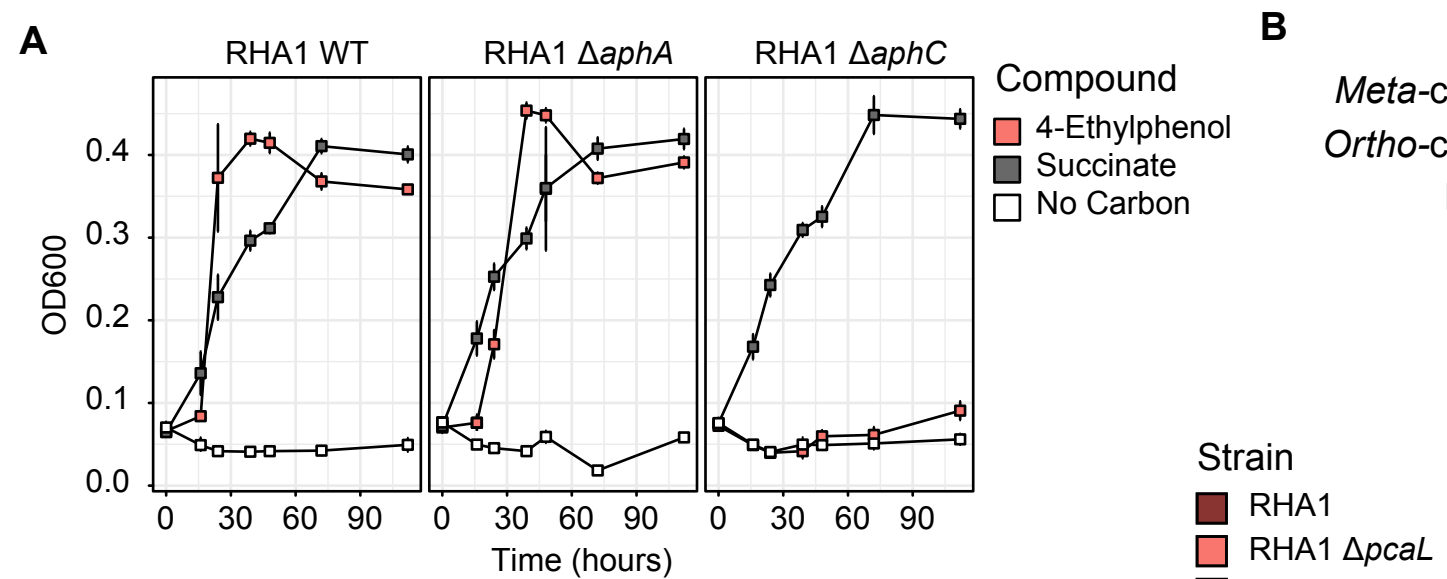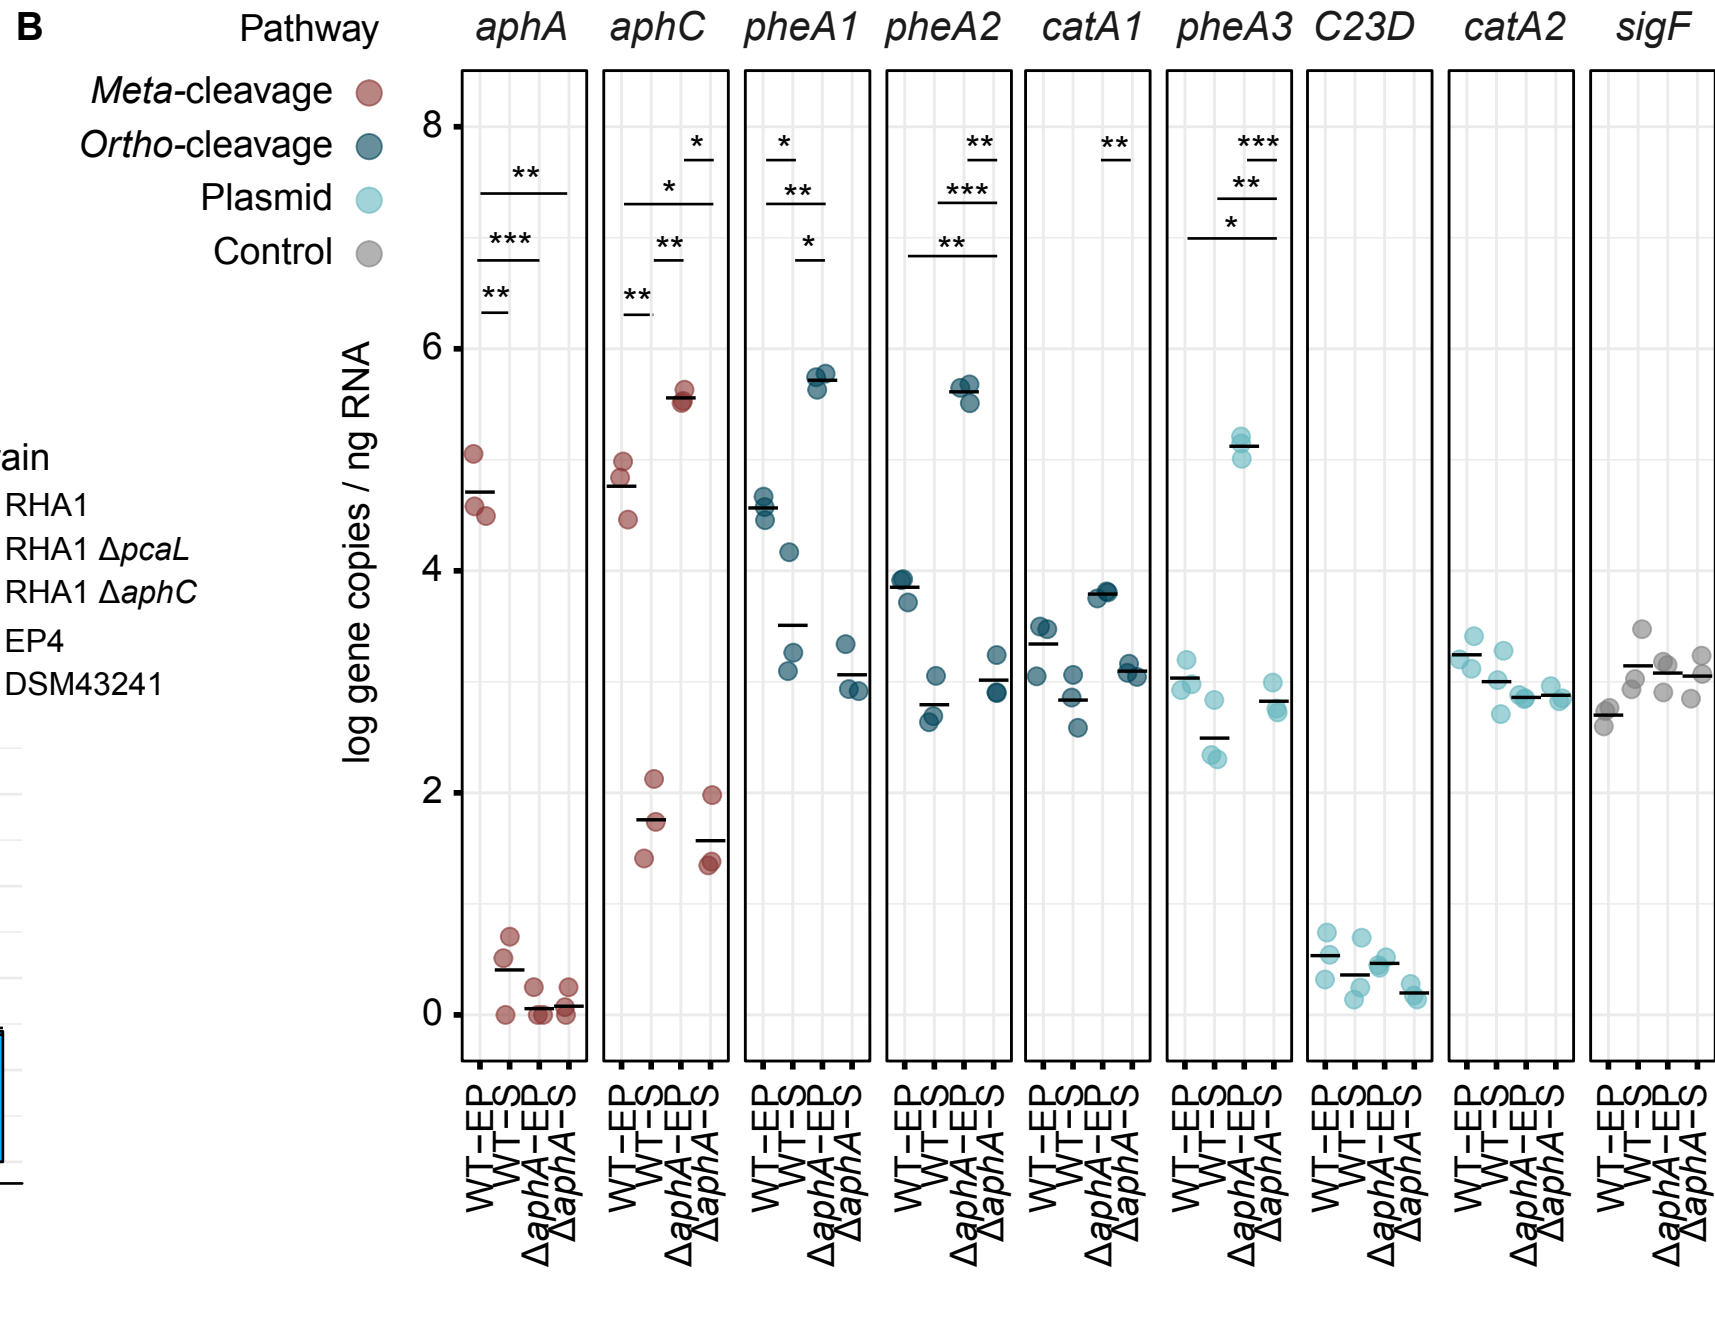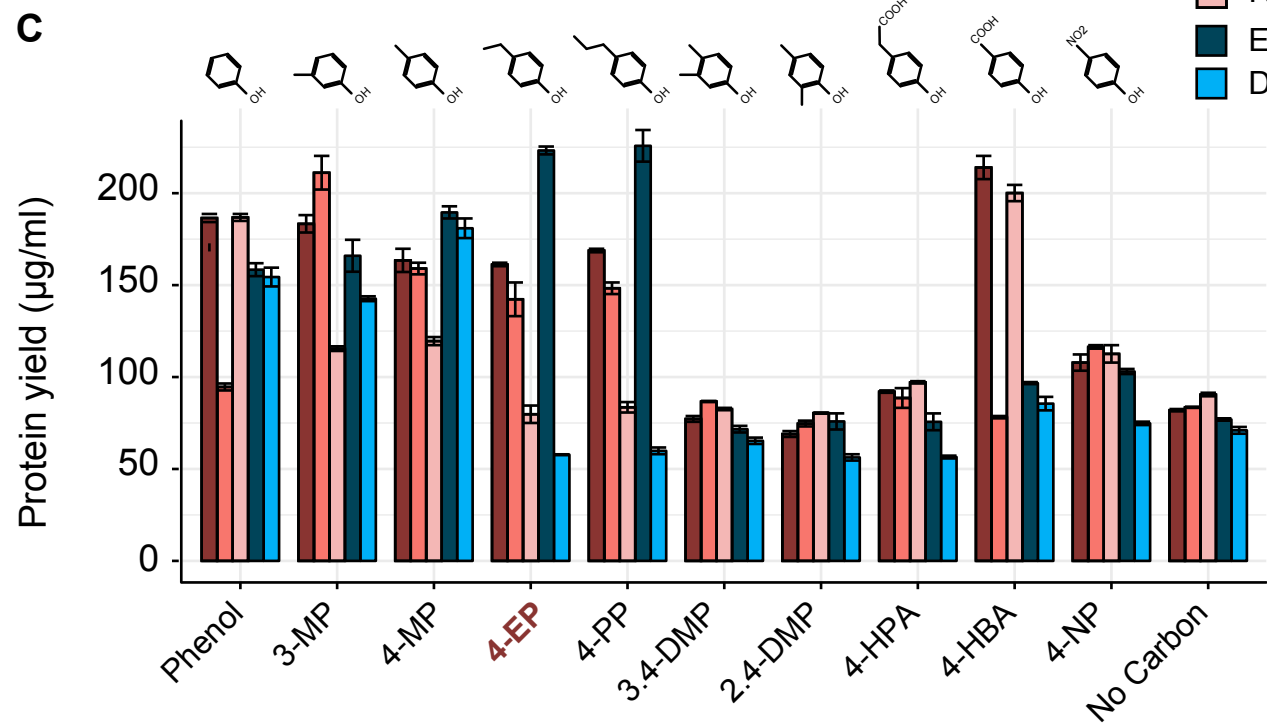

Source: https://www.biorxiv.org/content/10.1101/674713v1.full.pdf
